# Supplementary material for: N 2 O isotopocule measurements using laser spectroscopy: analyzer characterization and intercomparison
Source: Copernicus journal article supplement (doi:10.5194/amt-2019-451), 2019-12-05
Supplement: Supplementary file 1 [file amt-2019-451-supplement.zip]

# N<sub>2</sub>O isotopocule measurements using laser spectroscopy: analyzer characterization and intercomparison

Stephen J. Harris<sup>1,2,\*</sup>, Jesper Liisberg<sup>3,\*</sup>, Longlong Xia<sup>4</sup>, Jing Wei<sup>5</sup>, Kerstin Zeyer<sup>5</sup>, Longfei Yu<sup>5</sup>, Matti Barthel<sup>6</sup>, Benjamin Wolf<sup>4</sup>, Bryce F.J. Kelly<sup>1</sup>, Dioni I. Cendón<sup>2</sup>, Thomas Blunier<sup>3</sup>, Johan Six<sup>6</sup>, Joachim Mohn<sup>5</sup>

## Supplementary Material

### Supplementary Material 1 - IRMS Methodology

10 IRMS analyses were conducted at ETH Zürich using a gas preparation unit (Trace Gas, Elementar, Manchester, UK) coupled to an IsoPrime100 IRMS (Elementar, Manchester, UK). The gas preparation unit was modified with an additional chemical trap (0.5 in diameter stainless steel), located immediately downstream from the autosampler to pre-condition samples. This pre-trap was filled before each run with new NaOH, Mg(ClO<sub>4</sub>)<sub>2</sub>, and activated carbon in the direction of flow and was designed as a first step to  
15 scrub CO<sub>2</sub> and H<sub>2</sub>O. After pre-scrubbing, the samples were purged through a second set of chemical traps (NaOH, Mg(ClO<sub>4</sub>)<sub>2</sub>) before cryogenic trapping and focusing in liquid N<sub>2</sub>. Before final injection into the IRMS, the purified gas sample was directed through a permeation drier and subsequently separated in a gas chromatograph column (5 Å molecular sieve). The IRMS is equipped with five Faraday cups with *m/z* of 30, 31, 44, 45, 46, measuring  $\delta^{15}\text{N}^{\text{bulk}}$  and  $\delta^{18}\text{O}$  of N<sub>2</sub>O and  $\delta^{15}\text{N}$  of the NO<sup>+</sup> molecule dissociated  
20 from N<sub>2</sub>O during ionization in the source. The <sup>15</sup>N/<sup>14</sup>N ratio of the NO molecule reflects the  $\alpha$  (central) position N of the initial N<sub>2</sub>O, thus allowing the measurement of the site-specific isotopic composition of N<sub>2</sub>O. During each run three sets of two working standards (~ 3 ppm N<sub>2</sub>O mixed in synthetic air) with different isotopic composition ( $\delta^{15}\text{N}^{\alpha} = 0.954 \pm 0.123 \text{ ‰}$  and  $34.446 \pm 0.179 \text{ ‰}$ ;  $\delta^{15}\text{N}^{\beta} = 2.574 \pm 0.086 \text{ ‰}$  and  $35.98 \pm 0.221 \text{ ‰}$ ;  $\delta^{18}\text{O} = 39.741 \pm 0.051 \text{ ‰}$  and  $38.527 \pm 0.107 \text{ ‰}$ ) were included with a batch of  
25 22 samples at the beginning, middle and end of each run. Sample peak ratios are initially reported against a N<sub>2</sub>O reference gas peak (100% N<sub>2</sub>O, Carbagas, Gümligen, Switzerland) and are subsequently corrected for drift and span using the working standards. Instrument linearity and stability was frequently checked

by injection of 10 reference gas pulses of either varying or identical height respectively, with accepted levels of  $< 0.03 \text{ } \mu\text{A}^{-1}$ . Since instrument linearity could only be achieved for either  $\text{N}_2\text{O}$  or  $\text{NO}$ , the instrument was tuned for the former and  $\delta^{15}\text{N}^\alpha$  non-linearity subsequently corrected using sample peak heights by determining non-linearity of  $\delta^{15}\text{N}^\alpha$  with diluted working standards.

5

Supplementary Material 2 - Experimental setups

Figs. S2-1 to S2-10 depict the setup for the gas matrix, trace gas and two end-member mixing experiments undertaken in this study. Experiments were performed simultaneously for all analyzers, with the exception of the TREX-QCLAS, which requires an extensive measurement protocol to trap and measure

10  $\text{N}_2\text{O}$  (Ibraim et al., 2018) and thus could not be integrated concurrently with the other analyzers.

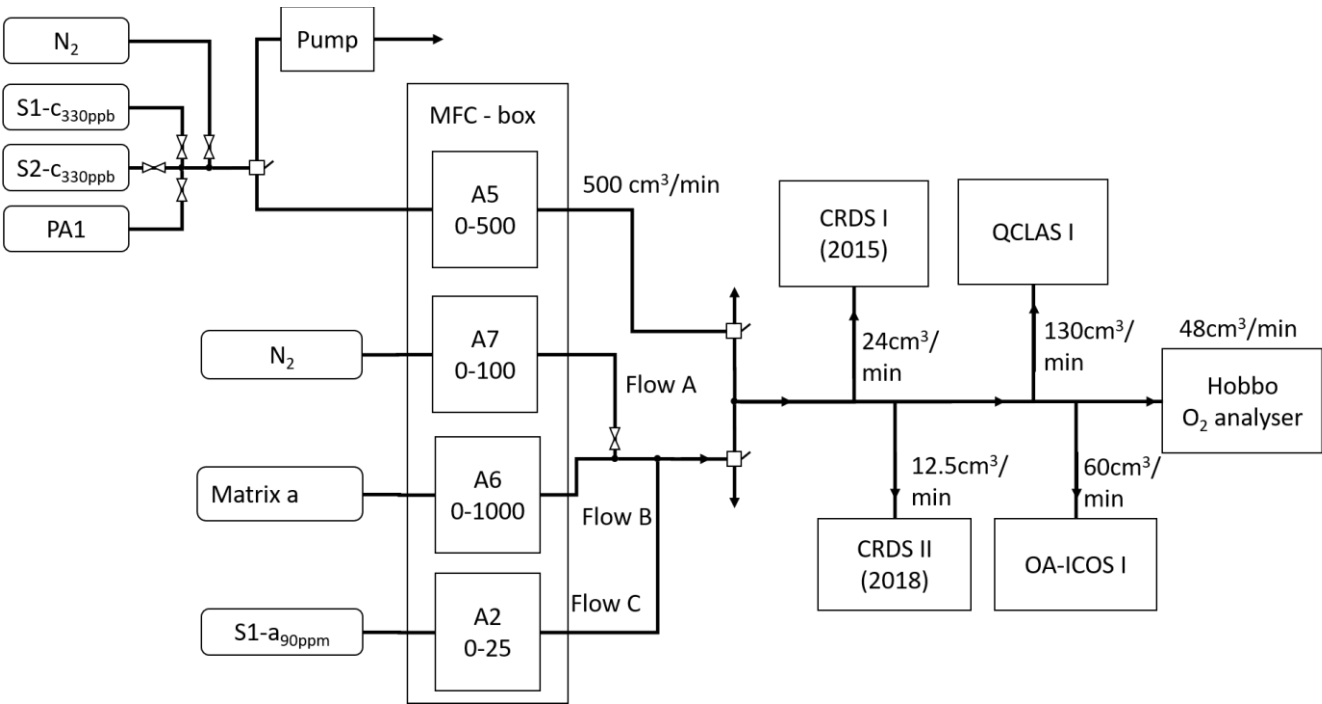

**Fig. S2-1.** Experimental setup for the  $\text{O}_2$  dependence testing performed in Section 2.4.5.

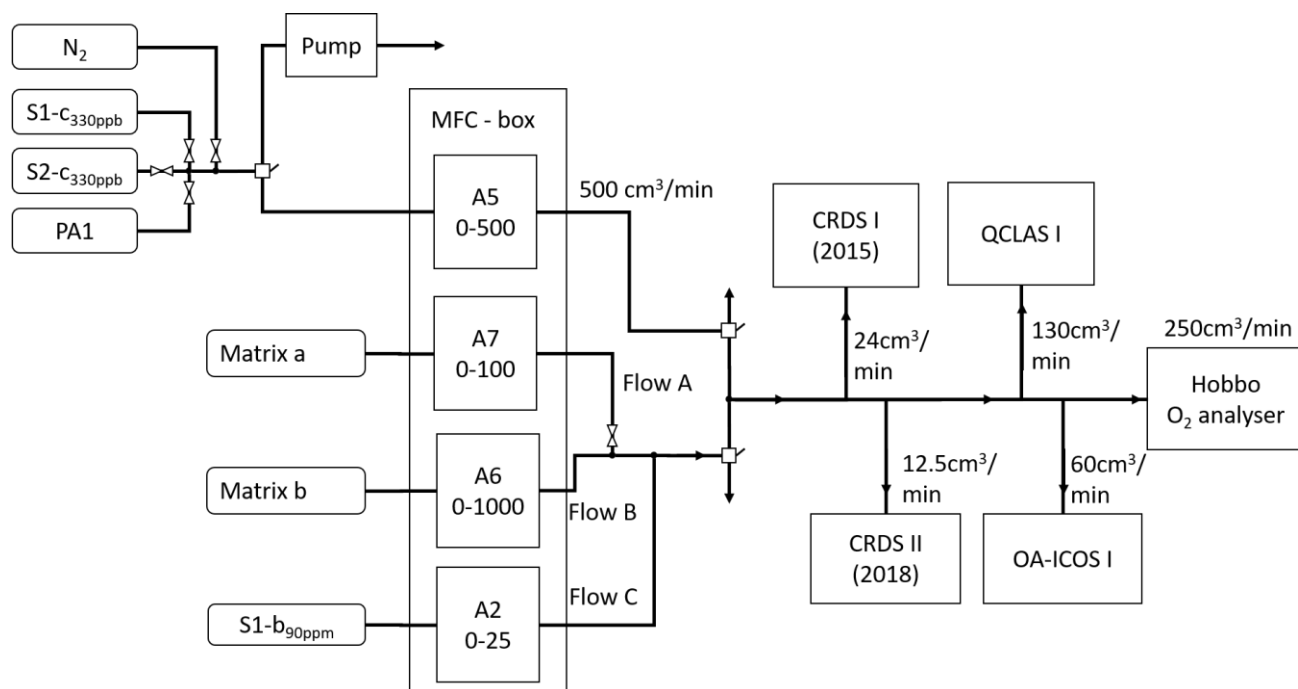

**Fig. S2-2.** Experimental setup for the Ar dependence testing performed in Section 2.4.5.

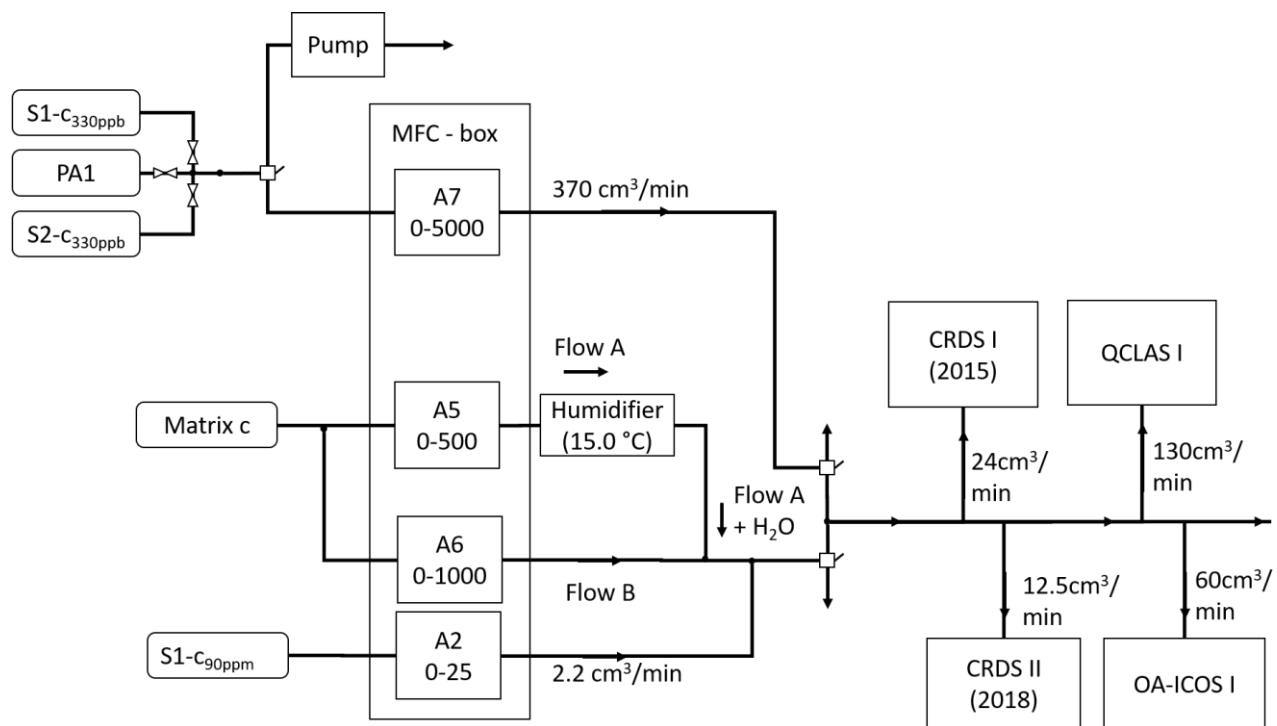

**Fig. S2-3.** Experimental setup for the H<sub>2</sub>O dependence testing performed in Section 2.4.6.

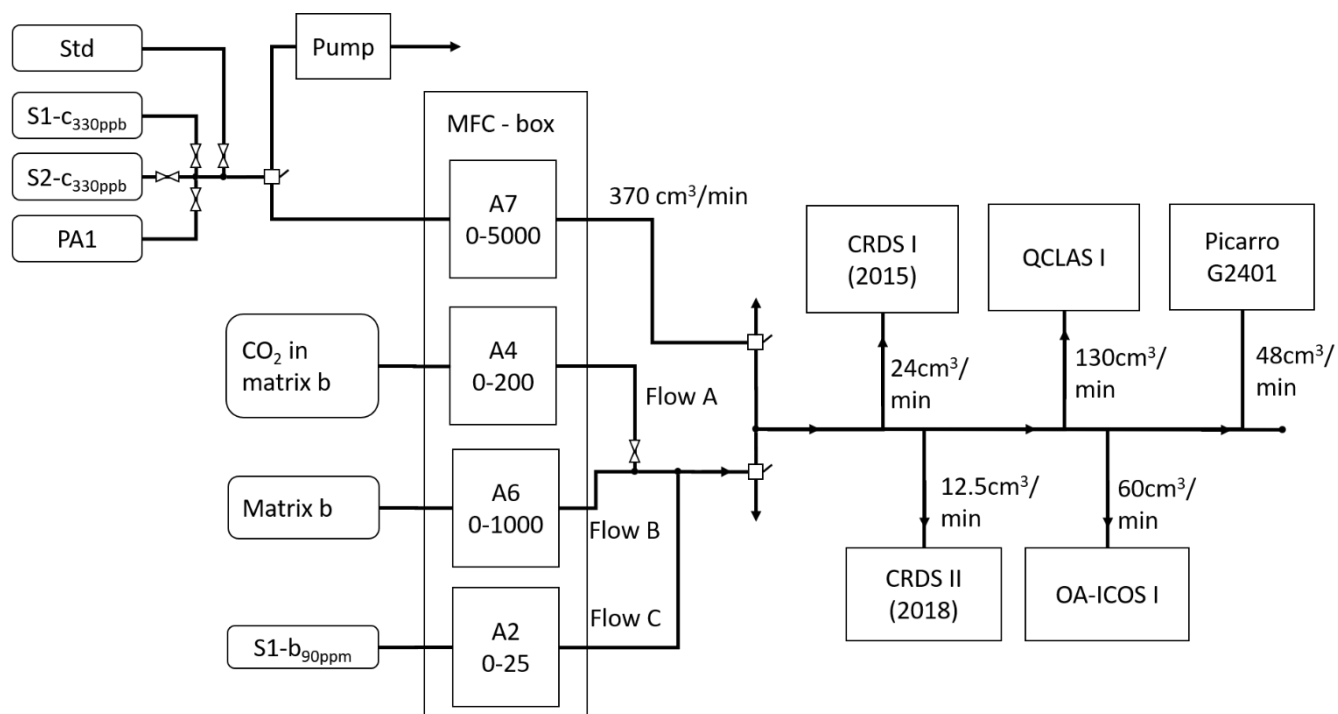

**Fig. S2-4.** Experimental setup for the CO<sub>2</sub> dependence testing performed in Section 2.4.6.

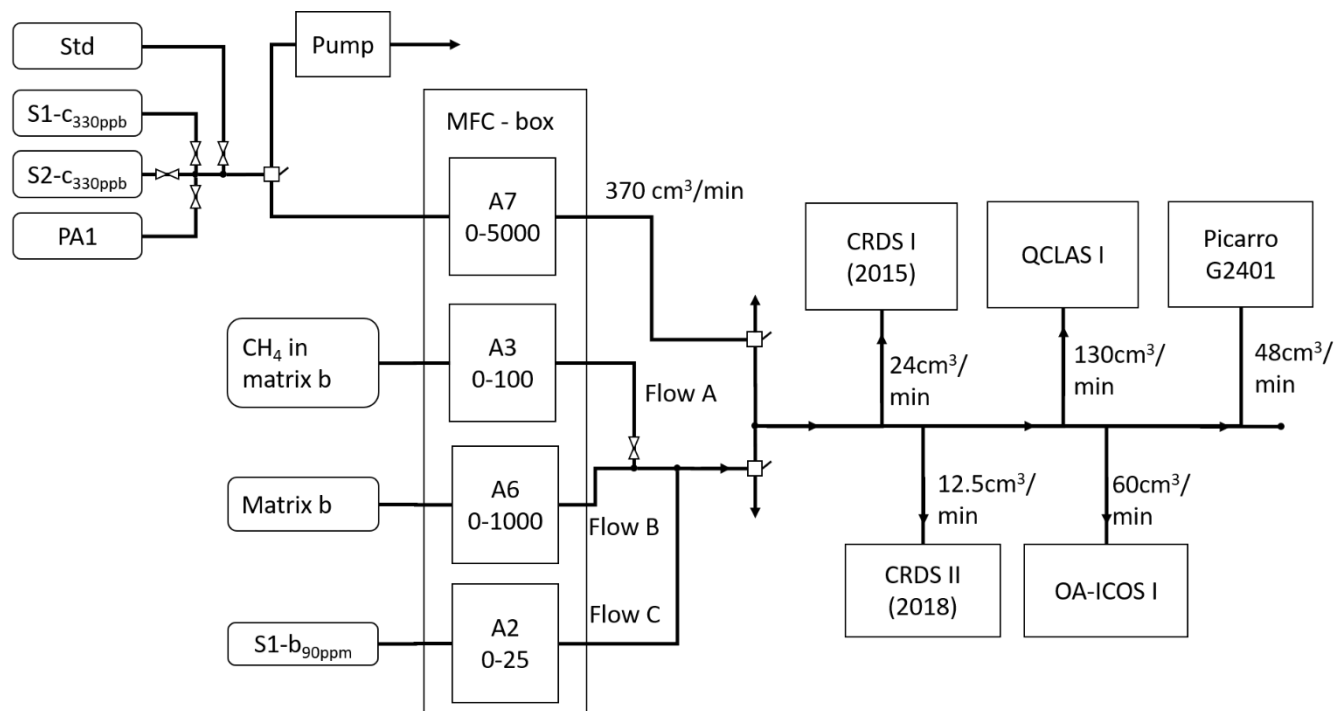

**Fig. S2-5.** Experimental setup for the CH<sub>4</sub> dependence testing performed in Section 2.4.6.

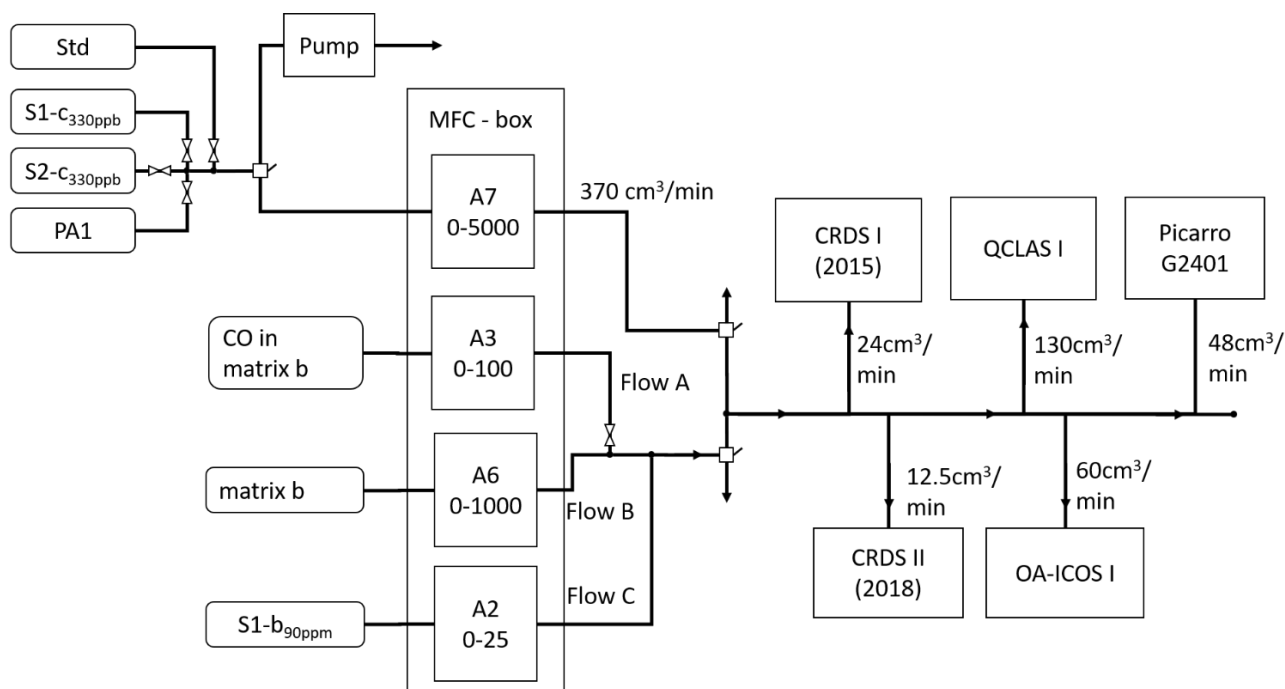

**Fig. S2-6.** Experimental setup for the CO dependence testing performed in Section 2.4.6.

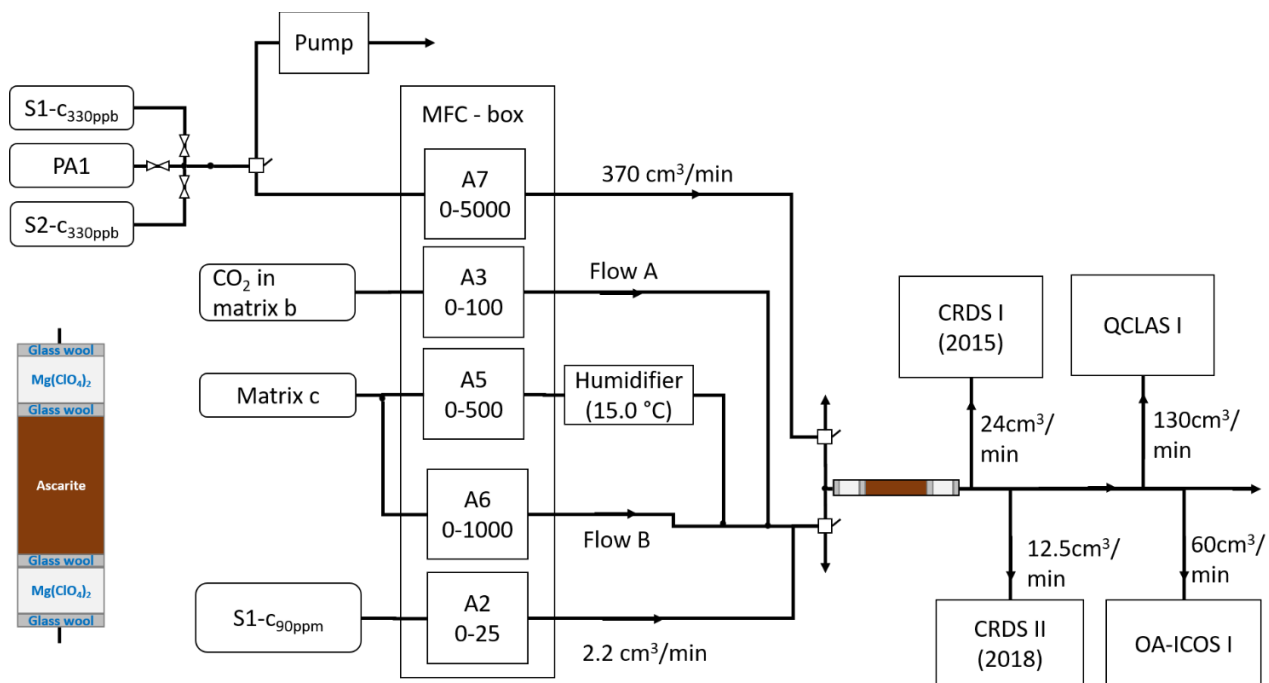

**Fig. S2-7.** Experimental setup for the Ascarite and Sofnocat trap testing performed in Section 2.4.7.

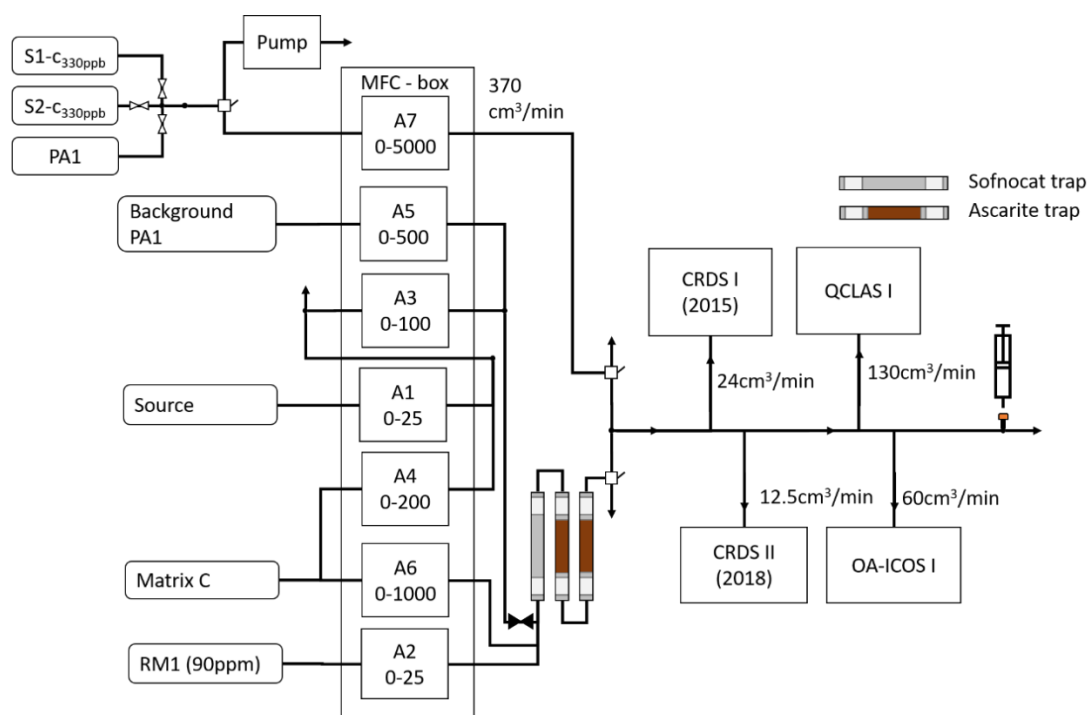

**Fig. S2-8.** Experimental setup for Experiments 1 and 2 performed in Section 2.4.8.

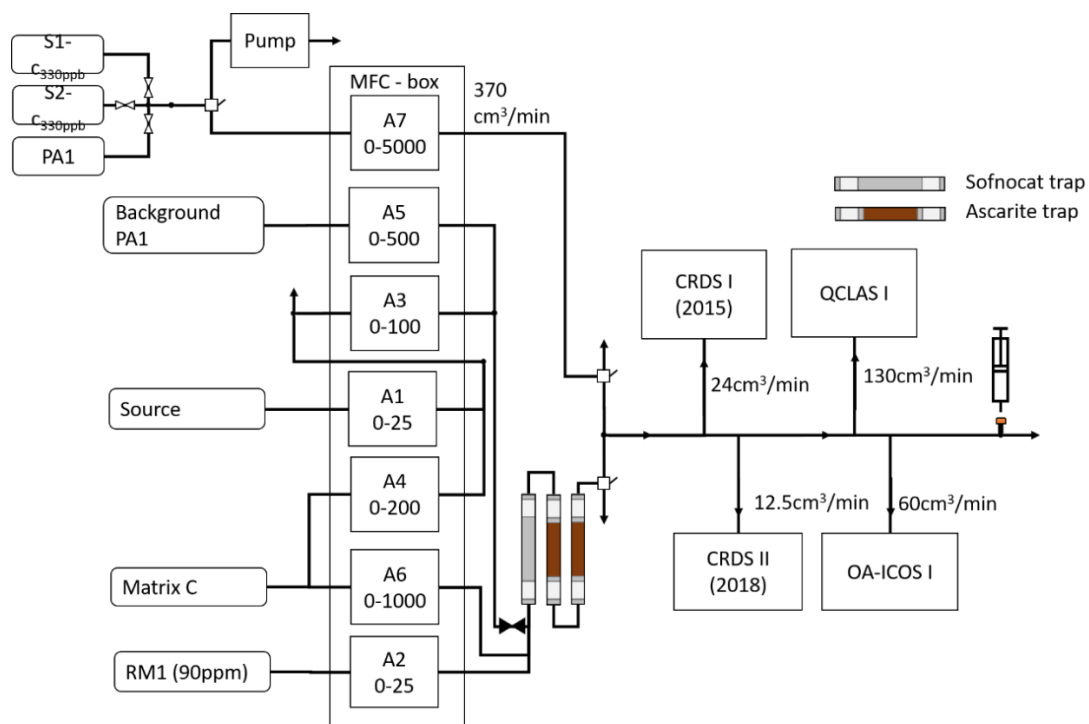

**Fig. S2-9.** Experimental setup for Experiments 3 and 4 performed in Section 2.4.8.

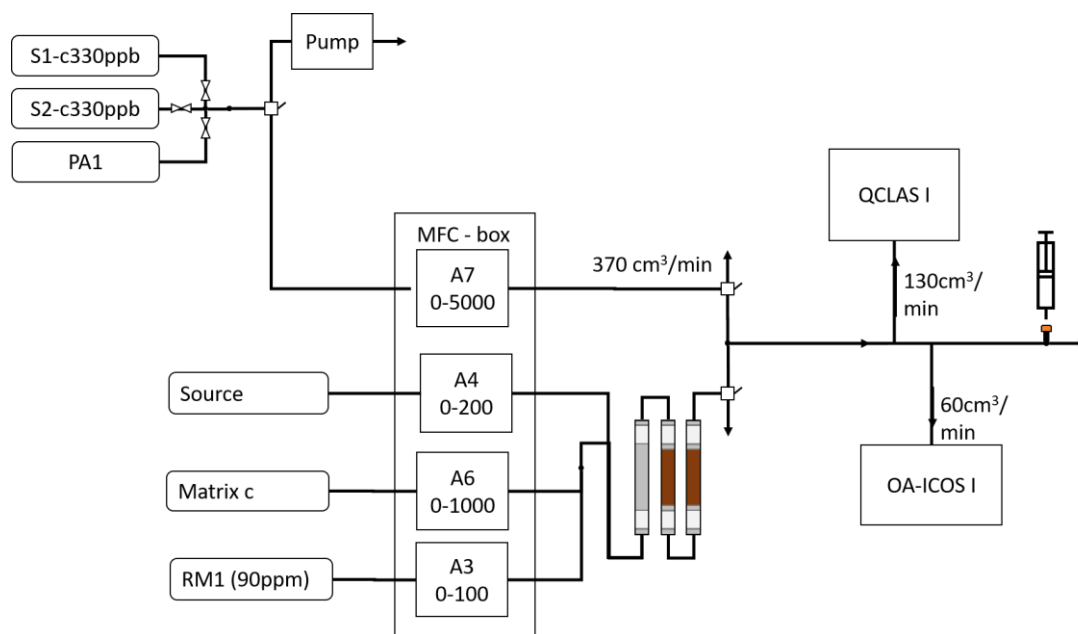

**Fig. S2-10.** Experimental setup for Experiments 5 and 6 performed in Section 2.4.8.

## 5 Supplementary Material 3 – Application of an automatic spectral correction method for QCLAS measurements

The primary cause of the observed excess drift in QCLAS I isotopocule measurements was fluctuating spectral baseline structure. That baseline structure, at an absorbance level of  $\sim 5 \times 10^{-5}$ , was likely due to interference fringes that were enhanced by somewhat dirty absorption cell mirrors (pers. comm. Aerodyne Research Inc.). One way to reduce the effects of excess baseline structure is to employ the instrument operation mode “Automatic Background”, wherein a spectrum is recorded while zero-air is injected, and subsequent spectra are divided by the recorded background spectrum. Periodic zero-air injections with refreshed background spectra can reduce the effect of changing baseline structure. Aerodyne recommends that “Automatic Background” be used in measurements with very weak absorptions, such as in the measurements reported in this paper. However, Aerodyne Research Inc. recognizes that frequent backgrounds may not be convenient or practical in all circumstances. Also, instrument operators may not observe a gradual increase in baseline structure over time.

Recently, Aerodyne has been developing a new method of correcting data that is influenced by changing baseline structure. In this new method, injections of zero air and calibrations may be less frequent than would otherwise be necessary. An outline of the correction method provided by Aerodyne Research Inc. is as follows. Mixing ratio (MR) and spectral data are grouped according to type: background gas, calibration gas (Cal), and air sample measurements. Averages for the MR's and spectra for the groups are subtracted. An aggregate subtracted spectrum array is smoothed to the absorption linewidth. A principal component analysis [PCA] is performed, so that spectral fluctuations are represented as a sum of vectors,  $V_i(x)$ , times amplitude histories,  $A_i(t)$ . For the "Cal" segments, we fit the recorded MR's with a sub-set of  $\{A_i(t)\}$ . If the specific linear combination of  $\{A_i(t)\}$  from the MR fit well-represent the "Cal" segments, we apply that linear combination of  $\{A_i(t)\}$  to the full measured data-set to determine MR adjustments.

In the Allan variance experiments performed on QCLAS I in this study (Sect. 3.1), the instruments were continuously sampling from a tank, so fictive hourly calibration periods (5 m duration) were created and used to generate mixing-ratio corrections. This method is computationally rapid, as ~8 hr of MR data can be adjusted in seconds. A summary of the corrected data is provided in Table S3-1. This new method is not yet published or broadly verified, but Aerodyne Research Inc. intends, after further validation, to share the methodology with the measurement community.

**Table S3-1.** Summary of the corrected QCLAS I Allan variance data acquired in Sect. 3.1.  $1\sigma$  data refers to Allan deviation (square root of Allan variance).

|                        | N <sub>2</sub> O [ppb] |                   |                   | $\delta^{15}\text{N}^a$ [‰] |                   |                   | $\delta^{15}\text{N}^b$ [‰] |                   |                   |
|------------------------|------------------------|-------------------|-------------------|-----------------------------|-------------------|-------------------|-----------------------------|-------------------|-------------------|
| N <sub>2</sub> O [ppb] | 1 $\sigma$ (1s)        | 1 $\sigma$ (300s) | 1 $\sigma$ (600s) | 1 $\sigma$ (1s)             | 1 $\sigma$ (300s) | 1 $\sigma$ (600s) | 1 $\sigma$ (1s)             | 1 $\sigma$ (300s) | 1 $\sigma$ (600s) |
| 326.5                  | 0.062                  | 0.021             | 0.024             | 1.2                         | 0.39              | 0.37              | 1.7                         | 0.42              | 0.55              |
| 1000                   | 0.165                  | 0.14              | 0.10              | 1.4                         | 0.19              | 0.23              | 1.4                         | 0.20              | 0.22              |
| 10000                  | 2.9                    | 0.46              | 0.38              | 0.33                        | 0.027             | 0.029             | 0.25                        | 0.024             | 0.028             |



#### Supplementary Material 4 – Short-term repeatability

To test the short-term repeatability of the instruments, sample gas at different at different [N<sub>2</sub>O]: ambient (PA1), 1 ppm, 10 ppm N<sub>2</sub>O was repeatedly analyzed 10 times for 15 min, intercepted by dry ambient air for 5 min. Gas mixtures with 1 and 10 ppm N<sub>2</sub>O were prepared by dynamically diluting S1-c<sub>90ppm</sub> with matrix gas c.. All data were corrected for drift using a linear interpolation of two bracketing anchor gas measurements (cf. Lebegue et al., 2016).

In Table S4-1 and S4-2 the short-term repeatability is expressed as standard deviation ( $1\sigma$ ) of 10 repeated measurements using averaging times of 300 s and 600 s, respectively. At ~327 ppb N<sub>2</sub>O, the best repeatability for  $\delta$  values was achieved by TREX-QCLAS I, with around 0.3 ‰ for  $\delta^{15}\text{N}^{\alpha}$ ,  $\delta^{15}\text{N}^{\beta}$ , and  $\delta^{18}\text{O}$  at 300 s averaging. The CRDS analyzers showed a similar repeatability level of 0.25–0.40 ‰ for all  $\delta$  values, at 600 s averaging, somewhat worse 0.35–0.6 ‰ at 300 s, but without the requirement for preconcentration. OA-ICOS I achieved a repeatability of 0.75 ‰ (1.1 ‰) for  $\delta^{15}\text{N}^{\alpha}$  and  $\delta^{15}\text{N}^{\beta}$ , and 1.3 ‰ (2.4‰) for  $\delta^{18}\text{O}$  at 600 s (300 s) averaging. QCLAS analyzers without preconcentration (QCLAS I) showed poor repeatability for  $\delta$  values regardless of averaging time, in-line with results acquired in Sect. 3.1. In contrast to  $\delta$  values, the best [N<sub>2</sub>O] repeatability was achieved by both the OA-ICOS I and QCLAS I (0.02 ppb), while the repeatability was worst for TREX-QCLAS I (0.48 ppb), due to the multiple parameters involved in [N<sub>2</sub>O] analysis.

At 1 ppm N<sub>2</sub>O, the repeatability of  $\delta$ -measurements improved for all instruments, with the exception of CRDS I, compared to ~327 ppb N<sub>2</sub>O. CRDS II achieved the best repeatability of 0.15 – 0.24 ‰ (0.20 – 0.26 ‰) for  $\delta$  values at 600 s (300 s) averaging, while the repeatability for CRDS I did not profit from an increase in [N<sub>2</sub>O] but degraded to 0.39 – 0.49 ‰ (0.65 – 0.91 ‰). OA-ICOS I achieved a repeatability of 0.28–0.37 ‰ (0.21–0.27 ‰) for  $\delta^{15}\text{N}^{\alpha}$  and  $\delta^{15}\text{N}^{\beta}$  and 0.69 ‰ (0.54 ‰) for  $\delta^{18}\text{O}$  at 300 s (600 s) averaging. QCLAS I showed again the weakest repeatability for  $\delta$  values of 2–7 ‰, irrespective of the averaging time. Again the best repeatability for [N<sub>2</sub>O] was achieved by OA-ICOS I and QCLAS I but worsened for all instruments compared to ~327 ppb N<sub>2</sub>O.

At 10 ppm N<sub>2</sub>O,  $\delta$ -measurement repeatability improved further compared to both near-atmospheric and 1 ppm measurements. The best repeatability was demonstrated by OA-ICOS I with 0.09‰, 0.16‰ and 0.20‰ at 300 s averaging, and 0.06‰, 0.13‰ and 16‰ at 600 s averaging for  $\delta^{15}\text{N}^\alpha$ ,  $\delta^{15}\text{N}^\beta$  and  $\delta^{18}\text{O}$ , respectively. The repeatability of QCLAS I was also largely improved to 0.3–0.45 ‰ for  $\delta^{15}\text{N}^\alpha$  and  $\delta^{15}\text{N}^\beta$ . In contrast, QCLAS I achieved the best [N<sub>2</sub>O] repeatability of 1.05 ppb (1.45 ppb) at 600 s (300 s) averaging.

**Table S4-1.** Repeatability acquired for [N<sub>2</sub>O],  $\delta^{15}\text{N}^\alpha$ ,  $\delta^{15}\text{N}^\beta$  and  $\delta^{18}\text{O}$  as standard deviation ( $1\sigma$ ) for 10 repeated measurements at 300 s averaging time. Measurements were made at 326.5 ppb (PA1), 1000 ppb and 10000 ppb N<sub>2</sub>O.

| Instrument                 | <i>n</i> | $1\sigma$        | N <sub>2</sub> O | $1\sigma$                    | $\delta^{15}\text{N}^\alpha$ | $1\sigma$                   | $\delta^{15}\text{N}^\beta$ | $1\sigma$             | $\delta^{18}\text{O}$ |
|----------------------------|----------|------------------|------------------|------------------------------|------------------------------|-----------------------------|-----------------------------|-----------------------|-----------------------|
|                            |          | N <sub>2</sub> O | range            | $\delta^{15}\text{N}^\alpha$ | range                        | $\delta^{15}\text{N}^\beta$ | range                       | $\delta^{18}\text{O}$ | range                 |
|                            |          | [ppb]            | [ppb]            | [‰]                          | [‰]                          | [‰]                         | [‰]                         | [‰]                   | [‰]                   |
| 326.5 ppb N <sub>2</sub> O |          |                  |                  |                              |                              |                             |                             |                       |                       |
| CRDS I                     | 10       | 0.17             | 0.50             | 0.48                         | 1.82                         | 0.38                        | 1.07                        | 0.59                  | 2.03                  |
| CRDS II                    | 10       | 0.05             | 0.13             | 0.58                         | 1.64                         | 0.37                        | 1.14                        | 0.35                  | 0.94                  |
| OA-ICOS I                  | 10       | 0.02             | 0.06             | 1.12                         | 3.32                         | 1.14                        | 3.26                        | 2.40                  | 7.06                  |
| QCLAS I                    | 10       | 0.02             | 0.05             | 6.60                         | 19.19                        | 9.84                        | 31.35                       | -                     | -                     |
| TREX-QCLAS I               | 10       | 0.48             | 1.36             | 0.27                         | 0.68                         | 0.31                        | 0.97                        | 0.29                  | 0.73                  |
| 1000 ppb N <sub>2</sub> O  |          |                  |                  |                              |                              |                             |                             |                       |                       |
| CRDS I                     | 10       | 0.87             | 2.78             | 0.75                         | 2.37                         | 0.91                        | 2.82                        | 0.65                  | 1.95                  |
| CRDS II                    | 10       | 0.45             | 1.15             | 0.20                         | 0.70                         | 0.26                        | 0.91                        | 0.23                  | 0.61                  |
| OA-ICOS I                  | 10       | 0.24             | 0.88             | 0.37                         | 1.40                         | 0.28                        | 0.83                        | 0.69                  | 2.28                  |
| QCLAS I                    | 10       | 0.31             | 0.87             | 2.38                         | 7.47                         | 6.62                        | 16.75                       | -                     | -                     |
| 10000 ppb N <sub>2</sub> O |          |                  |                  |                              |                              |                             |                             |                       |                       |
| OA-ICOS I                  | 10       | 2.13             | 6.65             | 0.09                         | 0.26                         | 0.16                        | 0.49                        | 0.20                  | 0.64                  |
| QCLAS I                    | 10       | 1.45             | 4.77             | 0.28                         | 0.99                         | 0.43                        | 1.54                        | -                     | -                     |

**Table S4-2.** Repeatability acquired for [N<sub>2</sub>O],  $\delta^{15}\text{N}^{\alpha}$ ,  $\delta^{15}\text{N}^{\beta}$  and  $\delta^{18}\text{O}$  as standard deviation ( $1\sigma$ ) for 10 repeated measurements at 600s averaging time. Measurements were made at 326.5 ppb (PA1), 1000 ppb and 10000 ppb N<sub>2</sub>O.

| Instrument                 | <i>n</i> | $1\sigma$        | N <sub>2</sub> O | $1\sigma$                      | $\delta^{15}\text{N}^{\alpha}$ | $1\sigma$                     | $\delta^{15}\text{N}^{\beta}$ | $1\sigma$             | $\delta^{18}\text{O}$ |
|----------------------------|----------|------------------|------------------|--------------------------------|--------------------------------|-------------------------------|-------------------------------|-----------------------|-----------------------|
|                            |          | N <sub>2</sub> O | range            | $\delta^{15}\text{N}^{\alpha}$ | range                          | $\delta^{15}\text{N}^{\beta}$ | range                         | $\delta^{18}\text{O}$ | range                 |
|                            |          | [ppb]            | [ppb]            | [‰]                            | [‰]                            | [‰]                           | [‰]                           | [‰]                   | [‰]                   |
| 326.5 ppb N <sub>2</sub> O |          |                  |                  |                                |                                |                               |                               |                       |                       |
| CRDS I                     | 10       | 0.17             | 0.48             | 0.39                           | 1.12                           | 0.23                          | 0.84                          | 0.37                  | 1.43                  |
| CRDS II                    | 10       | 0.05             | 0.13             | 0.34                           | 1.04                           | 0.29                          | 1.04                          | 0.30                  | 1.07                  |
| OA-ICOS I                  | 10       | 0.01             | 0.04             | 0.77                           | 2.33                           | 0.75                          | 2.05                          | 1.29                  | 3.45                  |
| QCLAS I                    | 10       | 0.02             | 0.06             | 6.99                           | 17.63                          | 11.66                         | 32.97                         | -                     | -                     |
| 1000 ppb N <sub>2</sub> O  |          |                  |                  |                                |                                |                               |                               |                       |                       |
| CRDS I                     | 10       | 0.66             | 2.05             | 0.49                           | 1.72                           | 0.48                          | 1.47                          | 0.39                  | 1.15                  |
| CRDS II                    | 10       | 0.39             | 1.15             | 0.24                           | 0.70                           | 0.15                          | 0.46                          | 0.16                  | 0.50                  |
| OA-ICOS I                  | 10       | 0.23             | 0.69             | 0.27                           | 0.88                           | 0.21                          | 0.61                          | 0.54                  | 1.84                  |
| QCLAS I                    | 10       | 0.21             | 0.62             | 2.21                           | 7.19                           | 6.34                          | 16.30                         | -                     | -                     |
| 10000 ppb N <sub>2</sub> O |          |                  |                  |                                |                                |                               |                               |                       |                       |
| OA-ICOS I                  | 10       | 1.61             | 4.79             | $6.3\cdot 10^{-2}$             | 0.17                           | 0.13                          | 0.47                          | 0.16                  | 0.56                  |
| QCLAS I                    | 10       | 1.05             | 3.09             | 0.28                           | 0.89                           | 0.46                          | 1.64                          | -                     | -                     |

5

Supplementary Material 5 – Scaling of the signal-to-noise ratio

Expanding on the N<sub>2</sub>O mole fraction dependence testing performed in Sect. 2.4.4, we plotted the uncertainty ( $1\sigma$ ) of the single 5 min-averaged measurements performed across the three days of mole fraction dependence experimentation acquired by each analyzer, as shown in Fig. S5-1. Because the 5-  
10 min averaged data is acquired at the frequency rates as outlined in Table 1, individual points in Fig. S5-1 broadly correspond to the initial *starting point* of each Allan deviation plot (1s for OA-ICOS I, QCLAS I, II and III; 3.41s for CRDS I; 2.54s for CRDS II) for each analyzer measuring at a given N<sub>2</sub>O mole fraction. Fig. S5-1 is therefore a useful guide for determining the theoretical optimum measurement precision range for each analyzer. The behavior of this  $\delta$ -measurement uncertainty as a function of N<sub>2</sub>O  
15 mole fraction is also of great interest, as this will have important implications for situations where

measurements cannot be repeated in order to increase certainty in the measurement (e.g. low sample volume or soil flux chamber measurements). For  $\delta$  measurements, the greatest precision is likely to be achieved by OA-ICOS I between  $\sim 6000$ – $20000$  ppb  $N_2O$ , CRDS I and II between  $\sim 500$ – $1000$  ppb  $N_2O$ , and QCLAS I between  $\sim 30000$ – $90000$  ppb.

5

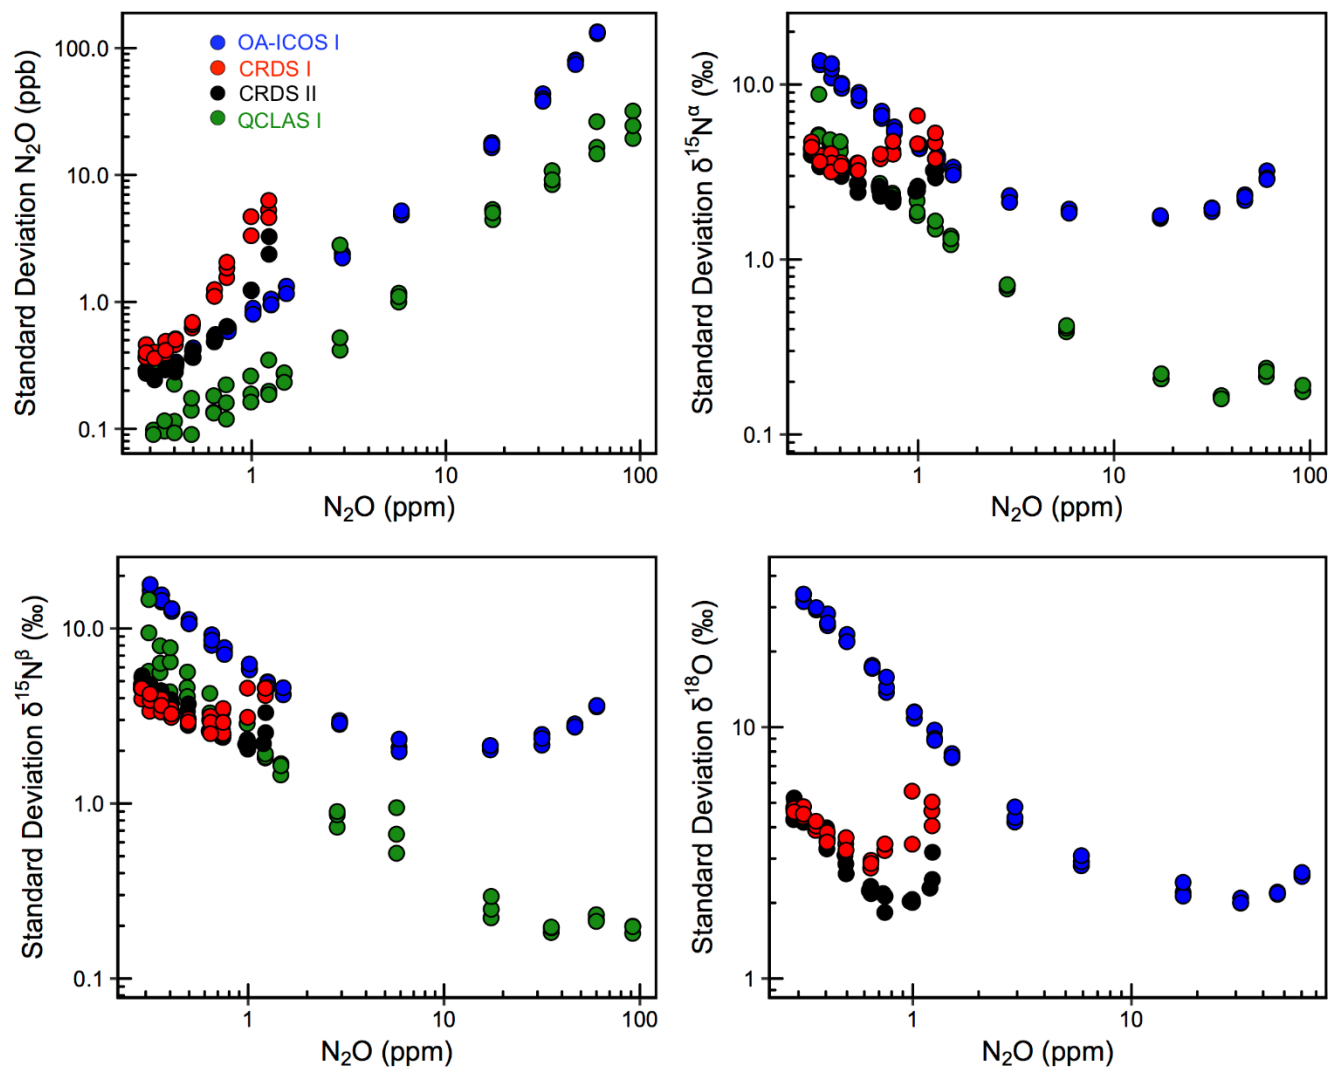

**Fig. S5-1.** Scaling of single measurement standard deviation ( $1\sigma$ ; 300 second averaging time) as a function of  $N_2O$  mole fraction for the OA-ICOS I (blue), CRDS I (red), CRDS II (black) and QCLAS I (green). Data was acquired during the mole fraction dependence testing depicted in Fig. 5.

## Supplementary Material 6 – Continuity of gas matrix and trace gas corrections at higher N<sub>2</sub>O mole fractions

Gas matrix (O<sub>2</sub>) and trace gas (CO<sub>2</sub>, CH<sub>4</sub> and CO) experiments conducted at 660 and 990 ppb N<sub>2</sub>O showed that the interference effects on N<sub>2</sub>O mole fraction and delta values is also dependent on N<sub>2</sub>O mole fraction.

- 5 Figs. S6-1 to S6-4 show all data (330, 660 and 990 ppb N<sub>2</sub>O) acquired during O<sub>2</sub>, CO<sub>2</sub>, CH<sub>4</sub> and CO dependence testing, and shows data corrected using Eqs. (7-8) for O<sub>2</sub> and Eq. (9) for CO<sub>2</sub>, CH<sub>4</sub> and CO. Corrected data is provided if the linear regression conducted at 330 ppb N<sub>2</sub>O for the interference effect was statistically significant at  $p < 0.05$ . The similarity between the CH<sub>4</sub> and CO dependencies for N<sub>2</sub>O mole fraction measurements across all instruments suggests that the apparent effects may be due to the
- 10 dynamic dilution process, rather than a discrete spectral interference effect. Therefore, data has not been corrected for these effects. Correction using Eqs. (7-8) and Eqs. (11-12) removes the matrix and trace gas effects to the extent that corrected measurements are typically within the uncertainty bounds of the anchor. The O<sub>2</sub> constants A and B, and a, b and c estimated for each analyzer are provided in Table S6-1, while the approximated trace gas constant values of  $A_x$ ,  $B_x$ ,  $a_x$  and  $b_x$  for each analyzer are provided in Table
- 15 S6-2.

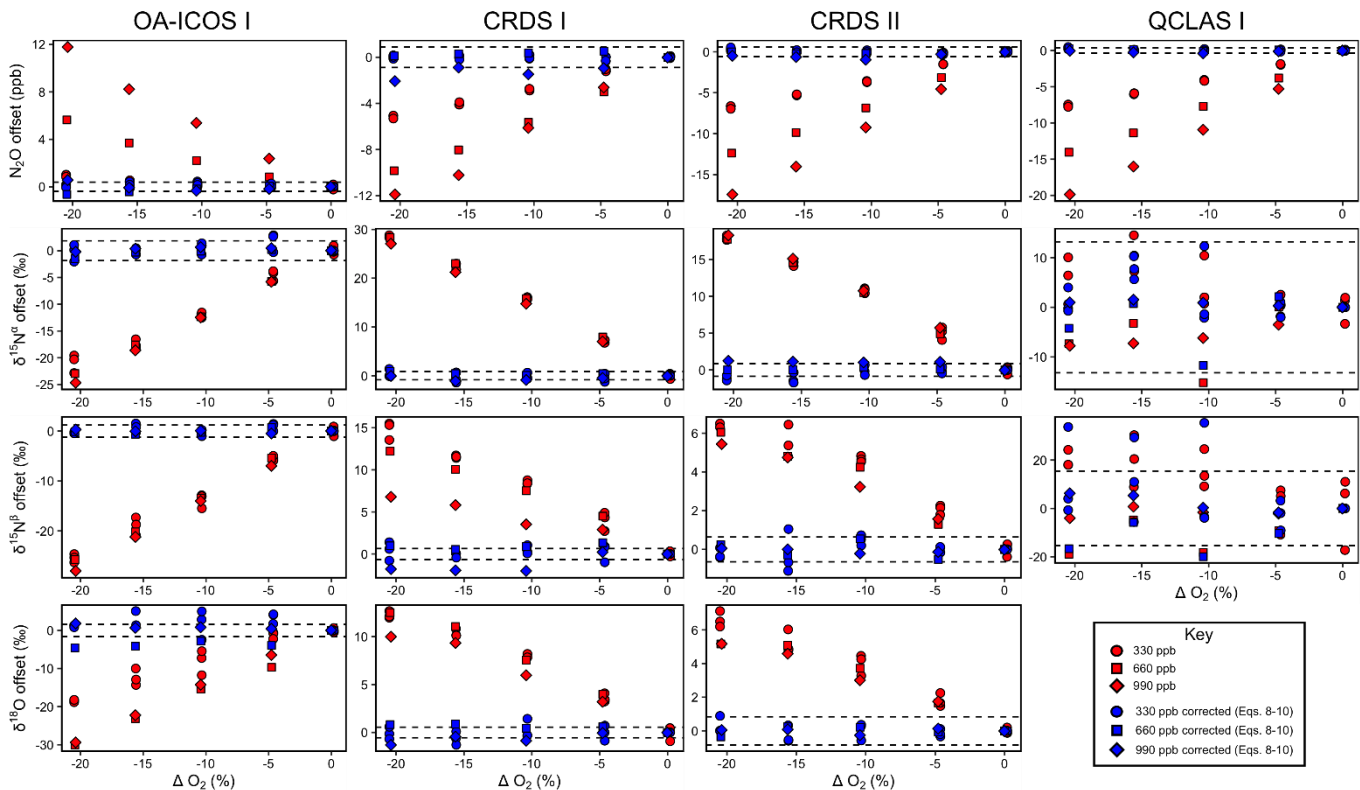

**Fig. S6-1.** Dependency of the measured  $[\text{N}_2\text{O}]$ ,  $\delta^{15}\text{N}^\alpha$ ,  $\delta^{15}\text{N}^\beta$  and  $\delta^{18}\text{O}$  values on changing  $\text{O}_2$  content (%) for OA-ICOS I, CRDS I, CRDS II, and QCLAS I. Non-corrected data is shown in red for various  $\text{N}_2\text{O}$  mole fraction testing (circle = 330 ppb; square = 660 ppb; diamond = 990 ppb). Corrected data using Eqs. (7-8) is shown in blue. The standard deviation of the Anchor gas ( $\pm 1\sigma$ ) is indicated by dashed lines.

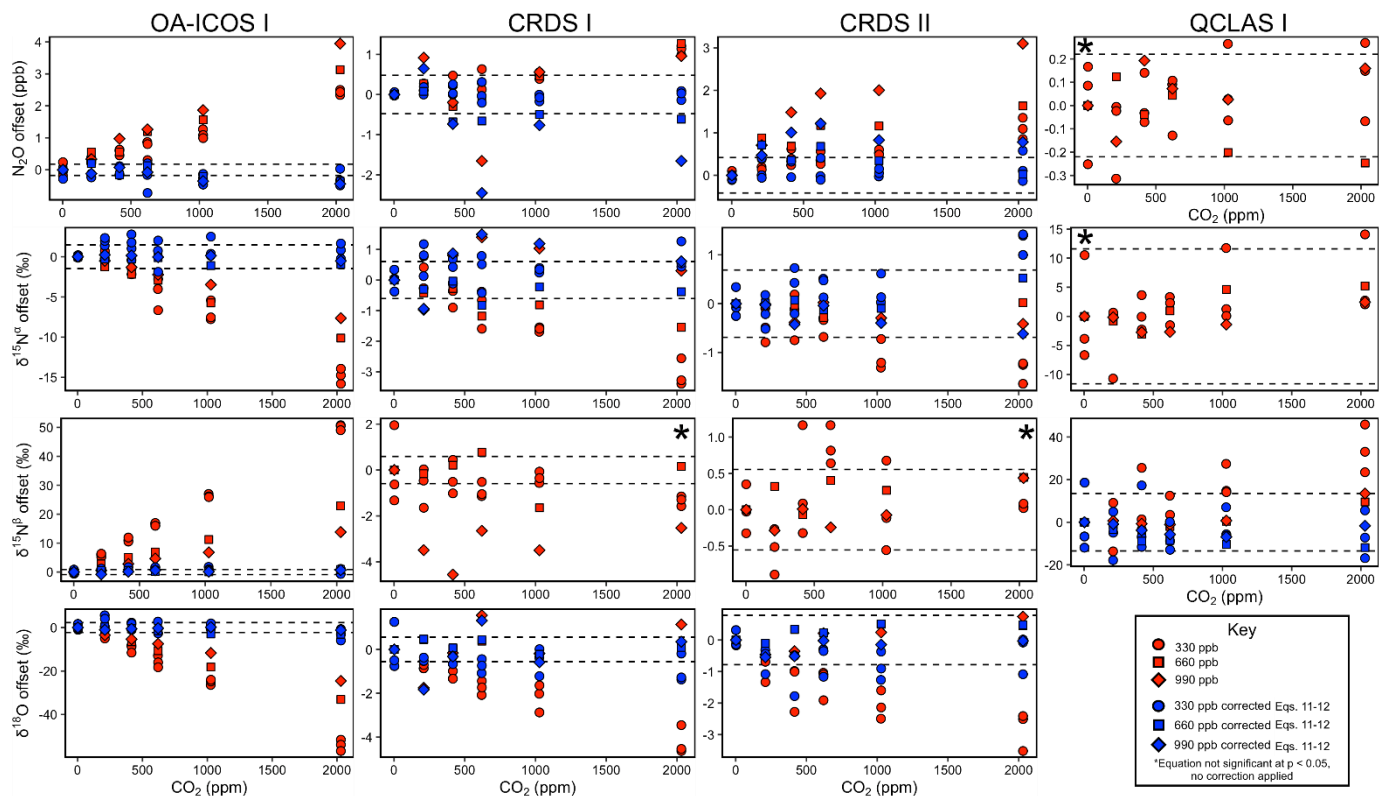

**Fig. S6-2.** Dependency of the measured  $[\text{N}_2\text{O}]$ ,  $\delta^{15}\text{N}^\alpha$ ,  $\delta^{15}\text{N}^\beta$  and  $\delta^{18}\text{O}$  values on  $\text{CO}_2$  (ppm) for OA-ICOS I, CRDS I, CRDS II, and QCLAS I. Non-corrected data is shown in red for various  $\text{N}_2\text{O}$  mole fraction testing (circle = 330 ppb; square = 660 ppb; diamond = 990 ppb). Corrected data using Eqs. (11-12) is shown in blue. The standard deviation of the Anchor gas ( $\pm 1\sigma$ ) is indicated by dashed lines.

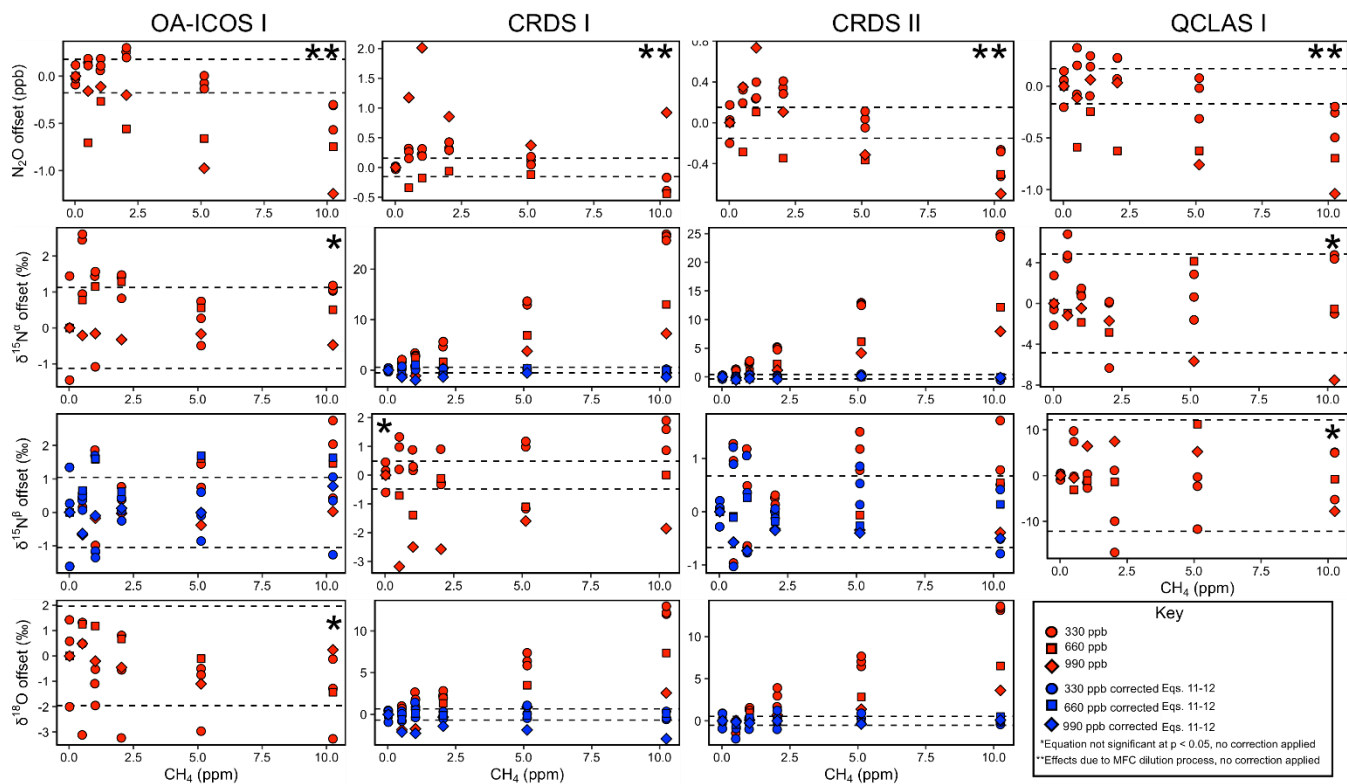

**Fig. S6-3.** Dependency of the measured  $\text{N}_2\text{O}$  mole fraction,  $\delta^{15}\text{N}^\alpha$ ,  $\delta^{15}\text{N}^\beta$  and  $\delta^{18}\text{O}$  values on  $\text{CH}_4$  (ppm) for OA-ICOS I, CRDS I, CRDS II, and QCLAS I. Non-corrected data is shown in red for various  $\text{N}_2\text{O}$  mole fractions tested (circle = 330 ppb; square = 660 ppb; diamond = 990 ppb). Corrected data using Eqs. (11-12) is shown in blue. The standard deviation of the Anchor gas ( $\pm 1\sigma$ ) is indicated by dashed lines.



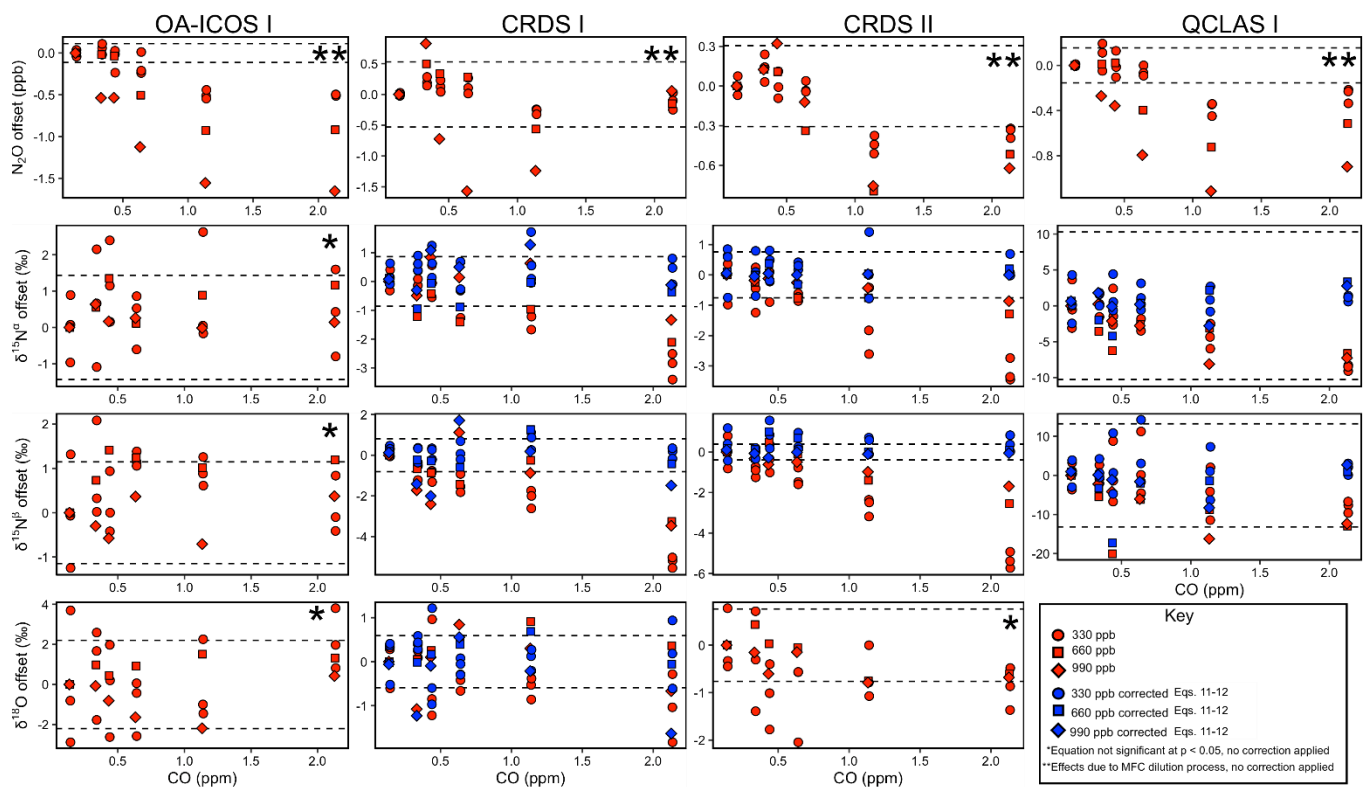

**Fig. S6-4.** Dependency of the measured  $\text{N}_2\text{O}$  mole fraction,  $\delta^{15}\text{N}^\alpha$ ,  $\delta^{15}\text{N}^\beta$  and  $\delta^{18}\text{O}$  values on  $\text{CO}$  (ppm) for OA-ICOS I, CRDS I, CRDS II, and QCLAS I. Non-corrected data is shown in red for various  $\text{N}_2\text{O}$  mole fractions tested (circle = 330 ppb; square = 660 ppb; diamond = 990 ppb). Corrected data using Eqs. (11-12) is shown in blue. The standard deviation of the Anchor gas ( $\pm 1\sigma$ ) is indicated by dashed lines.

10

15

**Table S6-1.** The fitted constants A, B, and a, b and c for OA-ICOS I, CRDS I, CRDS II and QCLAS I, derived using Eqs. 5 and 6. For values of 0, there was either no apparent trend or the fitted values fell within the uncertainty of the measurements. The units for each constant are A: 1/(ppb<sub>N<sub>2</sub>O</sub>·%O<sub>2</sub>), B: 1/%O<sub>2</sub>, a: ‰/(ppb<sub>N<sub>2</sub>O</sub><sup>2</sup>·%O<sub>2</sub>), b: ‰/(ppb<sub>N<sub>2</sub>O</sub>·%O<sub>2</sub>), and c: ‰/%O<sub>2</sub>.

|           | N <sub>2</sub> O [ppb] | δ <sup>15</sup> N <sup>α</sup> [‰] | δ <sup>15</sup> N <sup>β</sup> [‰] | δ <sup>18</sup> O [‰]  |
|-----------|------------------------|------------------------------------|------------------------------------|------------------------|
| OA-ICOS I |                        |                                    |                                    |                        |
| A         | -5.97·10 <sup>-7</sup> | n.a.                               | n.a.                               | n.a.                   |
| a         | n.a.                   | -1.37·10 <sup>-8</sup>             | -2.57·10 <sup>-7</sup>             | -2.93·10 <sup>-6</sup> |
| B         | 7.09·10 <sup>-5</sup>  | n.a.                               | n.a.                               | n.a.                   |
| b         | n.a.                   | 2.07·10 <sup>-4</sup>              | 5.39·10 <sup>-4</sup>              | 4.82·10 <sup>-3</sup>  |
| c         | n.a.                   | 1.00·10 <sup>0</sup>               | 1.07·10 <sup>0</sup>               | -4.40·10 <sup>-1</sup> |
| CRDS I    |                        |                                    |                                    |                        |
| A         | -2.40·10 <sup>-7</sup> | n.a.                               | n.a.                               | n.a.                   |
| a         | n.a.                   | 7.74·10 <sup>-7</sup>              | 7.71·10 <sup>-7</sup>              | 7.55·10 <sup>-7</sup>  |
| B         | 8.67·10 <sup>-4</sup>  | n.a.                               | n.a.                               | n.a.                   |
| b         | n.a.                   | -9.55·10 <sup>-4</sup>             | -4.71·10 <sup>-4</sup>             | -8.51·10 <sup>-4</sup> |
| c         | n.a.                   | -1.18·10 <sup>0</sup>              | -6.70·10 <sup>-1</sup>             | -4.40·10 <sup>-1</sup> |
| CRDS II   |                        |                                    |                                    |                        |
| A         | -2.38·10 <sup>-7</sup> | n.a.                               | n.a.                               | n.a.                   |
| a         | n.a.                   | -3.11·10 <sup>-8</sup>             | -7.71·10 <sup>-8</sup>             | -8.34·10 <sup>-8</sup> |
| B         | 1.08·10 <sup>-3</sup>  | n.a.                               | n.a.                               | n.a.                   |
| b         | n.a.                   | 6.71·10 <sup>-7</sup>              | 1.93·10 <sup>-4</sup>              | 2.03·10 <sup>-4</sup>  |
| c         | n.a.                   | -9.09·10 <sup>-1</sup>             | -4.06·10 <sup>-1</sup>             | -3.92·10 <sup>-1</sup> |
| QCLAS I   |                        |                                    |                                    |                        |
| A         | -2.20·10 <sup>-7</sup> | n.a.                               | n.a.                               | n.a.                   |
| a         | n.a.                   | 0                                  | 0                                  | n.d.                   |
| B         | 1.21·10 <sup>-3</sup>  | n.a.                               | n.a.                               | n.a.                   |

|   |      |   |   |      |
|---|------|---|---|------|
| b | n.a. | 0 | 0 | n.d. |
| c | n.a. | 0 | 0 | n.d. |

---

n.a. not applicable  
n.d. not determined

5

10

15

20

25

**Table S6-2.** The fitted constants  $A_x$ ,  $B_x$ ,  $a_x$  and  $b_x$ , for OA-ICOS I, CRDS I, CRDS II and QCLAS I, derived using Eqs. 9 and 10. For values of 0, there was either no apparent trend or the fitted values fell within the uncertainty of the measurements. The unit for  $A_x$  and  $a_x$  is ppm<sub>N2O</sub>/ppm<sub>trace gas</sub>, and the unit for  $B_x$  and  $b_x$  is 1/ppm<sub>trace gas</sub>.

|                 | [N <sub>2</sub> O]     |                        | $\delta^{15}\text{N}^\alpha$     |                                  | $\delta^{15}\text{N}^\beta$     |                                 | $\delta^{18}\text{O}$     |                           |
|-----------------|------------------------|------------------------|----------------------------------|----------------------------------|---------------------------------|---------------------------------|---------------------------|---------------------------|
|                 | A                      | B                      | $a_{\delta^{15}\text{N}^\alpha}$ | $b_{\delta^{15}\text{N}^\alpha}$ | $a_{\delta^{15}\text{N}^\beta}$ | $b_{\delta^{15}\text{N}^\beta}$ | $a_{\delta^{18}\text{O}}$ | $b_{\delta^{18}\text{O}}$ |
| OA-ICOS I       |                        |                        |                                  |                                  |                                 |                                 |                           |                           |
| CO <sub>2</sub> | -3.35·10 <sup>-4</sup> | 2.181·10 <sup>-3</sup> | -1.50·10 <sup>-3</sup>           | -2.49·10 <sup>-3</sup>           | 8.91·10 <sup>-3</sup>           | -1.86·10 <sup>-3</sup>          | -6.53·10 <sup>-3</sup>    | -6.25·10 <sup>-3</sup>    |
| CH <sub>4</sub> | 0                      | 0                      | 0                                | 0                                | 5.71·10 <sup>-2</sup>           | 0                               | 0                         | 0                         |
| CO              | 0                      | 0                      | 0                                | 0                                | 0                               | 0                               | 0                         | 0                         |
| CRDS I          |                        |                        |                                  |                                  |                                 |                                 |                           |                           |
| CO <sub>2</sub> | 9.44·10 <sup>-5</sup>  | 2.63·10 <sup>-4</sup>  | -7.780·10 <sup>-4</sup>          | -8.35·10 <sup>-4</sup>           | 0                               | 0                               | -1.32·10 <sup>-3</sup>    | -1.84·10 <sup>-3</sup>    |
| CH <sub>4</sub> | 0                      | 0                      | 8.42·10 <sup>-1</sup>            | 0                                | 2.651·10 <sup>-2</sup>          | 0                               | 3.99·10 <sup>-1</sup>     | 0                         |
| CO              | 0                      | 0                      | -4.05·10 <sup>-1</sup>           | 0                                | -7.88·10 <sup>-1</sup>          | 0                               | -1.34·10 <sup>-1</sup>    | 0                         |
| CRDS II         |                        |                        |                                  |                                  |                                 |                                 |                           |                           |
| CO <sub>2</sub> | -5.04·10 <sup>-4</sup> | 2.07·10 <sup>-3</sup>  | 3.20·10 <sup>-4</sup>            | 2.30·10 <sup>-4</sup>            | 0                               | 0                               | -1.06·10 <sup>-3</sup>    | 1.59·10 <sup>-3</sup>     |
| CH <sub>4</sub> | 0                      | 0                      | 7.94·10 <sup>-1</sup>            | 0                                | 3.71·10 <sup>-2</sup>           | 0                               | 4.27·10 <sup>-1</sup>     | 0                         |
| CO              | 0                      | 0                      | -4.66·10 <sup>-1</sup>           | 0                                | -7.83·10 <sup>-1</sup>          | 0                               | -2.03·10 <sup>-1</sup>    | 0                         |
| QCLAS I         |                        |                        |                                  |                                  |                                 |                                 |                           |                           |
| CO <sub>2</sub> | 0                      | 0                      | -8.56·10 <sup>-6</sup>           | 0                                | -5.73·10 <sup>-6</sup>          | 0                               | n.d.                      | n.d.                      |
| CH <sub>4</sub> | 0                      | 0                      | 0                                | 0                                | 0                               | 0                               | n.d.                      | n.d.                      |
| CO              | 0                      | 0                      | -1.41·10 <sup>0</sup>            | 0                                | -1.57·10 <sup>0</sup>           | 0                               | n.d.                      | n.d.                      |

5 n.d. not determined

## Supplementary Material 7 – Comparison with GC-IRMS

Fig. S7-1 shows the triplicate measurements (mean  $\pm 1\sigma$ ) obtained using the GC-IRMS plotted against expected mixing values calculated using MFC flow rates and the mole fraction and isotopic composition of *background* and *source*. A comparison between laser spectrometer and GC-IRMS measurements are presented in Figs. S7-2 to S7-5 using the mean  $\pm 1\sigma$  of triplicate measurements. TREX-QCLAS I measurements were undertaken separately, and therefore were not directly compared to IRMS measurements.

10 There was excellent agreement between the IRMS and calculated expected isotope values (all  $r^2 > 0.99$ ). Measurements for  $\delta^{15}\text{N}^\alpha$ ,  $\delta^{15}\text{N}^\beta$  and  $\delta^{15}\text{N}^{\text{bulk}}$  were all typically within  $\pm 1\text{‰}$  of expected values, while SP was within  $\pm 0.7\text{‰}$  of expected values.  $\delta^{18}\text{O}$  measurements were the poorest performing and were typically within  $\pm 3\text{‰}$  of expected values. The standard deviations of triplicate isotope measurements were typically between  $0.1 - 1\text{‰}$ .

15

Generally, there is good agreement between the laser spectrometers and GC measurements, but disagreement between the two techniques becomes pronounced at higher  $\Delta\text{N}_2\text{O}$  for OA-ICOS I and QCLAS I during experiments 5 and 6. All analyzers, with the exception of one triplicated measurement taken from CRDS I, showed better  $1\sigma$  repeatability than those acquired using GC. There was excellent  
20 agreement for  $\delta^{15}\text{N}^\alpha$ ,  $\delta^{15}\text{N}^\beta$  and  $\delta^{15}\text{N}^{\text{bulk}}$  between the IRMS and both CRDS I and II at all concentrations tested.  $\delta^{15}\text{N}^\alpha$ ,  $\delta^{15}\text{N}^\beta$  and  $\delta^{15}\text{N}^{\text{bulk}}$  measurements for these analyzers were typically within  $\pm 1\text{‰}$  of those acquired from IRMS, while SP measurements were typically within  $\pm 1.3\text{‰}$ . OA-ICOS I  $\delta^{15}\text{N}^\alpha$ ,  $\delta^{15}\text{N}^\beta$  and  $\delta^{15}\text{N}^{\text{bulk}}$  measurements were typically within  $\pm 2.5\text{‰}$  of IRMS, while SP were in slightly better agreement ( $\pm 1.7\text{‰}$ ). Conversely, QCLAS I showed good agreement with IRMS only at higher  $\Delta\text{N}_2\text{O}$  ( $>$   
25 1,000 ppb), presumably due to less precise measurements that are expected (based on results acquired in Section 3) to be acquired at the lower concentrations tested. For OA-ICOS I, the repeatability of the triplicate  $\delta^{15}\text{N}^\alpha$ ,  $\delta^{15}\text{N}^\beta$ ,  $\delta^{15}\text{N}^{\text{bulk}}$  and SP measurements was typically better than the IRMS exclusively at higher  $\Delta\text{N}_2\text{O}$  ( $>1,000\text{ ppb}$ ). CRDS I and II had comparable repeatability to the IRMS, and there was no

clear distinction based on  $\Delta\text{N}_2\text{O}$ . QCLAS I showed comparable or better repeatability to IRMS only at higher  $\Delta\text{N}_2\text{O}$  (>1,000 ppb).

5  $\delta^{18}\text{O}$  measurements from OA-ICOS I, and CRDS I and II showed good agreement with IRMS results (all  $r^2 > 0.98$ ), with the vast majority of measurements similarly within  $\pm 2\text{‰}$ . OA-ICOS I  $\delta^{18}\text{O}$  measurements had typically better repeatability compared to IRMS at higher  $\Delta\text{N}_2\text{O}$ , while both CRDS analyzers showed varied repeatability regardless of  $\Delta\text{N}_2\text{O}$ .

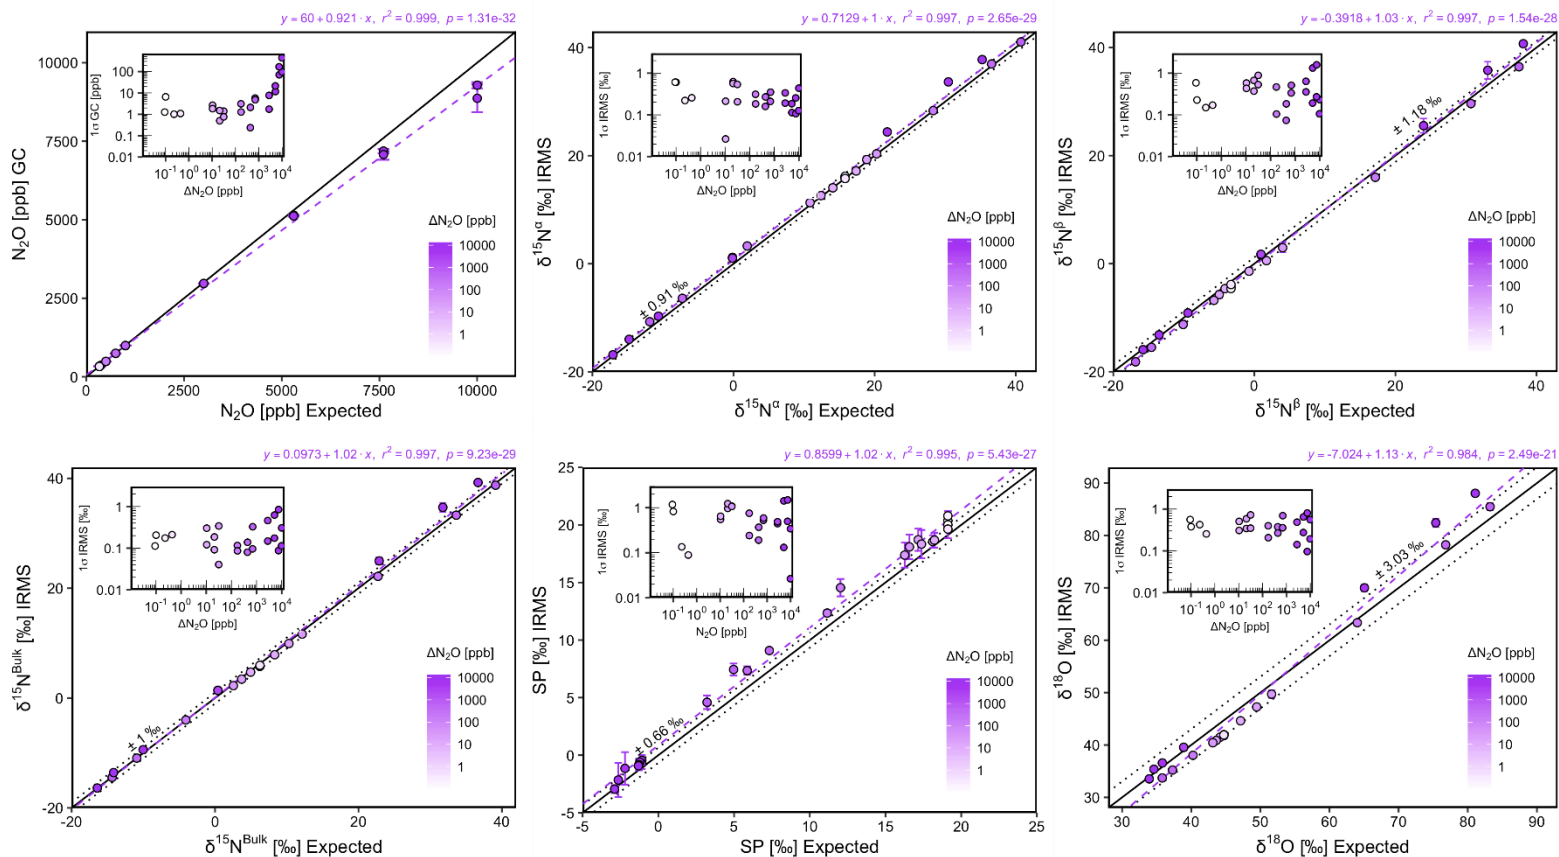

**Fig. S7-1.** Correlation diagrams for  $[N_2O]$ ,  $\delta^{15}N^\alpha$ ,  $\delta^{15}N^\beta$ ,  $\delta^{15}N^{bulk}$ , SP and  $\delta^{18}O$  measurements at various  $\Delta N_2O$  mole fractions analyzed by GC-IRMS plotted against expected values. The solid black line denotes the 1:1 line, while the dotted line indicates  $\pm 1\sigma$  of the residuals from the 1:1 line. The dashed black line represents a linear fit to the data. Individual equations, coefficients of determination ( $r^2$ ) and p-values are indicated above each plot. Each data point represents the mean and standard deviation ( $1\sigma$ ) of triplicate measurements. The inset plots indicate the standard deviation ( $1\sigma$ ) of the triplicate measurements achieved at different  $\Delta N_2O$  mole fractions, and the 1:1 line is similarly a solid line.

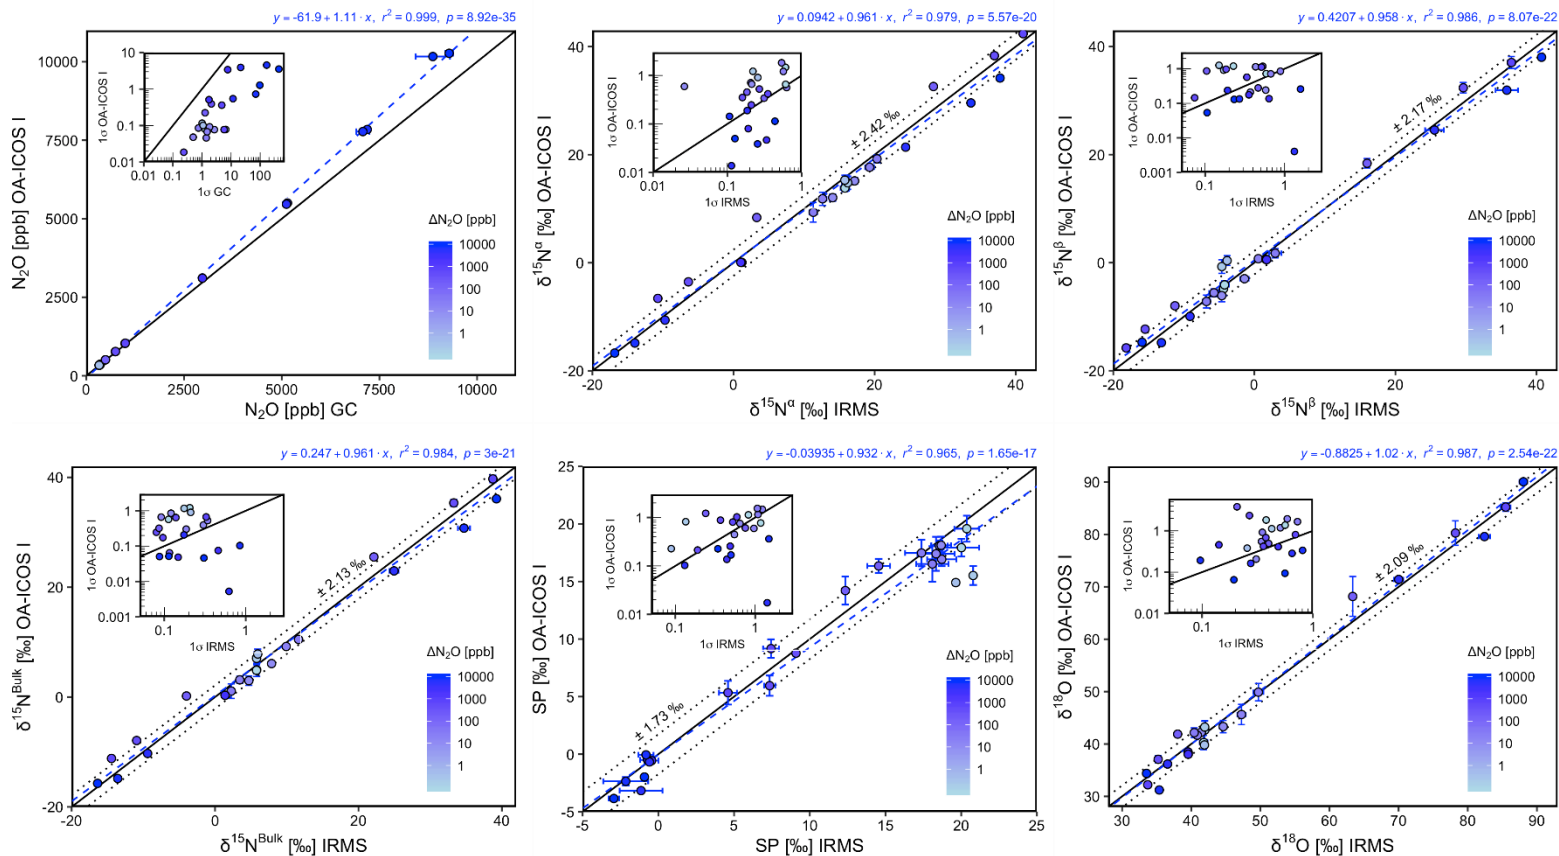

**Fig. S7-2.** Correlation diagrams for  $[N_2O]$ ,  $\delta^{15}N^\alpha$ ,  $\delta^{15}N^\beta$ ,  $\delta^{15}N^{bulk}$ , SP and  $\delta^{18}O$  measurements at various  $\Delta N_2O$  concentrations analyzed by both OA-ICOS I and GC-IRMS. The solid black line denotes the 1:1 line, while the dotted line indicates  $\pm 1\sigma$  of the residuals from the 1:1 line. The dashed blue line represents a linear fit to the data. Individual equations, coefficients of determination ( $r^2$ ) and p-values are indicated above each plot. Each data point represents the mean and standard deviation ( $1\sigma$ ) of triplicate measurements. The inset plots indicate the standard deviation ( $1\sigma$ ) of the triplicate measurements achieved at different  $\Delta N_2O$  concentrations, and the 1:1 line is similarly a solid line.



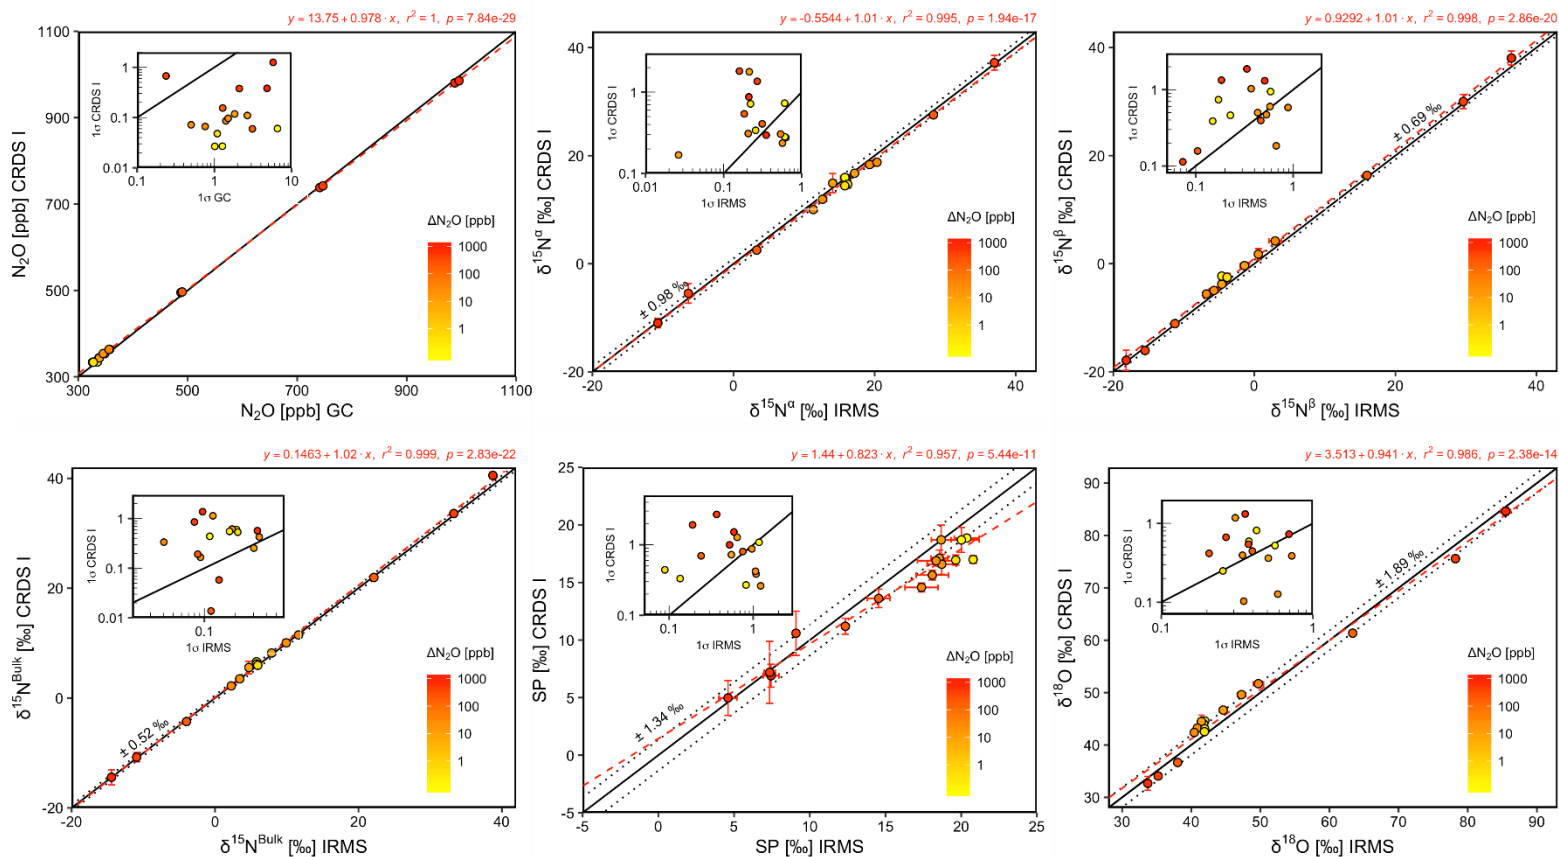

**Fig. S7-3.** Correlation diagrams for  $[N_2O]$ ,  $\delta^{15}N^\alpha$ ,  $\delta^{15}N^\beta$ ,  $\delta^{15}N^{bulk}$ , SP and  $\delta^{18}O$  measurements at various  $\Delta N_2O$  concentrations analyzed by both CRDS I and GC-IRMS. The solid black line denotes the 1:1 line, while the dotted line indicates  $\pm 1\sigma$  of the residuals from the 1:1 line. The dashed red line represents a linear fit to the data. Individual equations, coefficients of determination ( $r^2$ ) and p-values are indicated above each plot. Each data point represents the mean and standard deviation ( $1\sigma$ ) of triplicate measurements. The inset plots indicate the standard deviation ( $1\sigma$ ) of the triplicate measurements achieved at different  $\Delta N_2O$  concentrations, and the 1:1 line is similarly a solid line.

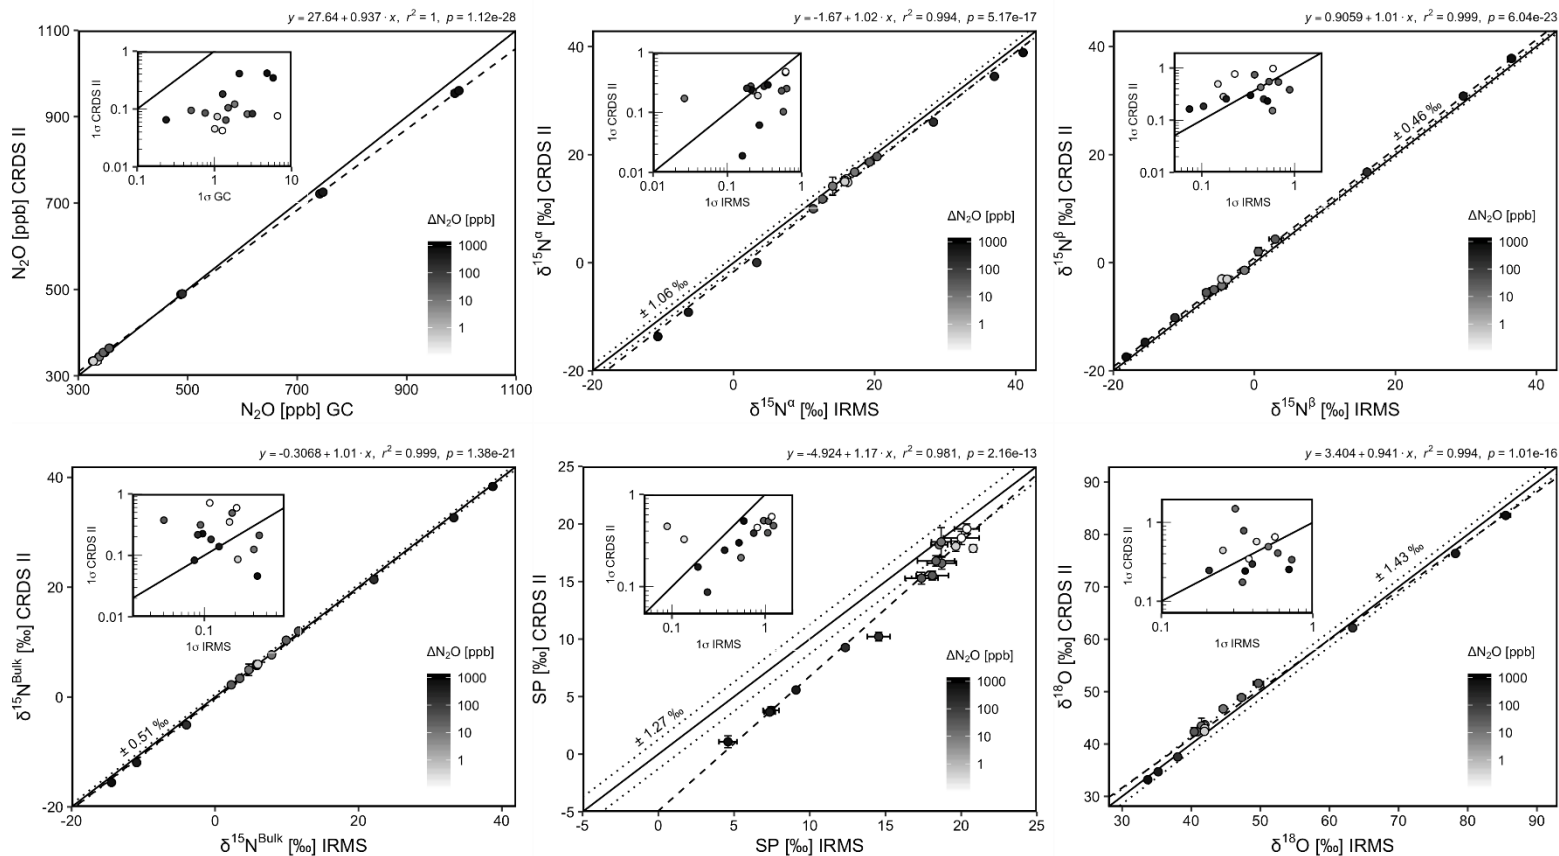

**Fig. S7-4.** Correlation diagrams for  $[\text{N}_2\text{O}]$ ,  $\delta^{15}\text{N}^\alpha$ ,  $\delta^{15}\text{N}^\beta$ ,  $\delta^{15}\text{N}^{\text{bulk}}$ , SP and  $\delta^{18}\text{O}$  measurements at various  $\Delta\text{N}_2\text{O}$  concentrations analyzed by both CRDS II and GC-IRMS. The solid black line denotes the 1:1 line, while the dotted line indicates  $\pm 1\sigma$  of the residuals from the 1:1 line. The dashed black line represents a linear fit to the data. Individual equations, coefficients of determination ( $r^2$ ) and p-values are indicated above each plot. Each data point represents the mean and standard deviation ( $1\sigma$ ) of triplicate measurements. The inset plots indicate the standard deviation ( $1\sigma$ ) of the triplicate measurements achieved at different  $\Delta\text{N}_2\text{O}$  concentrations, and the 1:1 line is similarly a solid line.

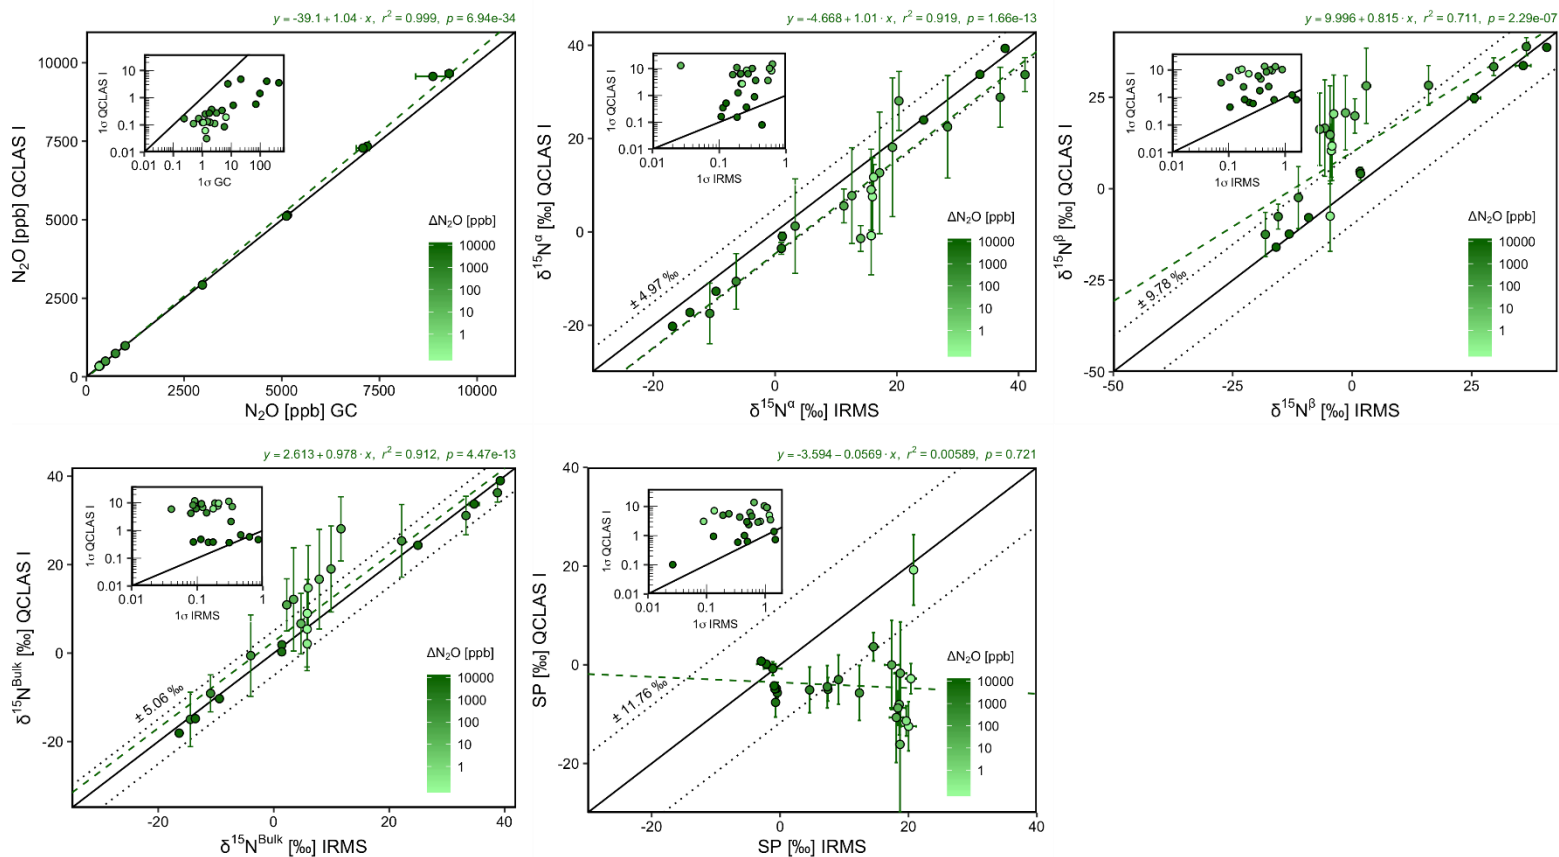

**Fig. S7-5.** Correlation diagrams for  $[N_2O]$ ,  $\delta^{15}N^\alpha$ ,  $\delta^{15}N^\beta$ ,  $\delta^{15}N^{bulk}$  and SP measurements at various  $\Delta N_2O$  concentrations analyzed by both QCLAS I and GC-IRMS. The solid black line denotes the 1:1 line, while the dotted line indicates  $\pm 1\sigma$  of the residuals from the 1:1 line. The dashed green line represents a linear fit to the data. Individual equations, coefficients of determination ( $r^2$ ) and p-values are indicated above each plot. Each data point represents the mean and standard deviation ( $1\sigma$ ) of triplicate measurements. The inset plots indicate the standard deviation ( $1\sigma$ ) of the triplicate measurements achieved at different  $\Delta N_2O$  concentrations, and the 1:1 line is similarly a solid line.
